# Supplementary material for: Patient-centred infertility care among Arab women experiencing infertility: a qualitative study
Source: PubMed Central journal article supplement — BMJ Open. 2021 Jun 18;11(6):e044300. doi: 10.1136/bmjopen-2020-044300 (PMC8215246; doi:10.1136/bmjopen-2020-044300), 2021-06-18
Supplement: bmjopen-2020-044300.draft_revisions.pdf [file bmjopen-2020-044300.draft_revisions.pdf]

# BMJ Open

BMJ Open is committed to open peer review. As part of this commitment we make the peer review history of every article we publish publicly available.

When an article is published we post the peer reviewers' comments and the authors' responses online. We also post the versions of the paper that were used during peer review. These are the versions that the peer review comments apply to.

The versions of the paper that follow are the versions that were submitted during the peer review process. They are not the versions of record or the final published versions. They should not be cited or distributed as the published version of this manuscript.

BMJ Open is an open access journal and the full, final, typeset and author-corrected version of record of the manuscript is available on our site with no access controls, subscription charges or pay-per-view fees (<http://bmjopen.bmj.com>).

If you have any questions on BMJ Open's open peer review process please email [info.bmjopen@bmj.com](mailto:info.bmjopen@bmj.com)

# BMJ Open

## Exploring patient-centered infertility care among Arab infertile women: a qualitative study

|                               |                                                                                                                                                                                                                                                                                                                                                                                                                                            |
|-------------------------------|--------------------------------------------------------------------------------------------------------------------------------------------------------------------------------------------------------------------------------------------------------------------------------------------------------------------------------------------------------------------------------------------------------------------------------------------|
| Journal:                      | <i>BMJ Open</i>                                                                                                                                                                                                                                                                                                                                                                                                                            |
| Manuscript ID                 | bmjopen-2020-044300                                                                                                                                                                                                                                                                                                                                                                                                                        |
| Article Type:                 | Original research                                                                                                                                                                                                                                                                                                                                                                                                                          |
| Date Submitted by the Author: | 05-Sep-2020                                                                                                                                                                                                                                                                                                                                                                                                                                |
| Complete List of Authors:     | Webair, Hana; Universiti Sains Malaysia - Kampus Kesihatan, Family Medicine; Hadhramout University College of Medicine and Health Sciences, Family Medicine<br>Ismail, Tengku Alina ; Universiti Sains Malaysia - Kampus Kesihatan, Community Medicine<br>Shaiful Bahari, Ismail ; Universiti Sains Malaysia - Kampus Kesihatan, Family Medicine<br>Khaffaji, Azza ; King Abdulaziz Hospital and Oncology Center, Obstetrics & Gynaecology |
| Keywords:                     | Quality in health care < HEALTH SERVICES ADMINISTRATION & MANAGEMENT, QUALITATIVE RESEARCH, REPRODUCTIVE MEDICINE                                                                                                                                                                                                                                                                                                                          |
|                               |                                                                                                                                                                                                                                                                                                                                                                                                                                            |

SCHOLARONE™  
Manuscripts

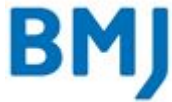

I, the Submitting Author has the right to grant and does grant on behalf of all authors of the Work (as defined in the below author licence), an exclusive licence and/or a non-exclusive licence for contributions from authors who are: i) UK Crown employees; ii) where BMJ has agreed a CC-BY licence shall apply, and/or iii) in accordance with the terms applicable for US Federal Government officers or employees acting as part of their official duties; on a worldwide, perpetual, irrevocable, royalty-free basis to BMJ Publishing Group Ltd ("BMJ") its licensees and where the relevant Journal is co-owned by BMJ to the co-owners of the Journal, to publish the Work in this journal and any other BMJ products and to exploit all rights, as set out in our [licence](#).

The Submitting Author accepts and understands that any supply made under these terms is made by BMJ to the Submitting Author unless you are acting as an employee on behalf of your employer or a postgraduate student of an affiliated institution which is paying any applicable article publishing charge ("APC") for Open Access articles. Where the Submitting Author wishes to make the Work available on an Open Access basis (and intends to pay the relevant APC), the terms of reuse of such Open Access shall be governed by a Creative Commons licence – details of these licences and which [Creative Commons](#) licence will apply to this Work are set out in our licence referred to above.

Other than as permitted in any relevant BMJ Author's Self Archiving Policies, I confirm this Work has not been accepted for publication elsewhere, is not being considered for publication elsewhere and does not duplicate material already published. I confirm all authors consent to publication of this Work and authorise the granting of this licence.

1 **TITLE** Exploring patient-centered infertility care among Arab infertile women: a qualitative study

2

3 Corresponding author: Hana Hasan Webair<sup>1,2\*</sup>,

4 Tengku Alina Tengku Ismail<sup>3</sup>,

5 Shaiful Bahari Ismail<sup>1</sup>,

6 Azza Jameel Khaffaji<sup>4</sup>

7 <sup>1</sup>Department of Family Medicine, School of Medical Sciences, Universiti Sains Malaysia, Health

8 Campus, 16150 Kubang Kerian, Kelantan, Malaysia

9 <sup>2</sup>Department of Family Medicine, Hadhramout University, College of Medicine, PO Box 50512,

10 Mukalla, Hadhramaut, Yemen

11 <sup>3</sup>Department of Community Medicine, School of Medical Sciences, Universiti Sains Malaysia, Health

12 Campus, 16150 Kubang Kerian, Kelantan, Malaysia

13 <sup>4</sup>Obstetrics and Gynaecology Department, King Abdulaziz Hospital, Ministry of Health, P.O.Box

14 31467 Jeddah 21497, Saudi Arabia

15 \*Corresponding address: MSc, Department of Family Medicine, School of Medical Sciences,

16 Universiti Sains Malaysia, Health Campus, 16150 Kubang Kerian, Kelantan, Malaysia. Email;

17 hhwebair@gmail.com. Tel: +601126502099.

18 Word counts: 3222

19

20

21

## 22 ABSTRACT

23 **Objective:** The current study aims to define patient-centred infertility care (PCIC) from the perspective  
24 of Arab women with infertility.

25 **Method:** Semi-structured in-depth telephonic interviews were conducted with Arab women with  
26 infertility from January 2017 to December 2018 to explore the concept of PCIC from their perspective.  
27 A purposive sample of 14 women was included with maximum variation. The sample included Arab  
28 women who received infertility treatment during the six months preceding the interview at any hospital  
29 in Jeddah, Saudi Arabia. We recruited participants until data saturation was reached and no new themes  
30 emerged. An interview guide covering the scope of patient experiences and how patients defined PCIC  
31 was used. Interviews were audio-recorded and transcribed verbatim. Data were analysed using an  
32 inductive thematic analysis.

33 **Results:** Participants highlighted nine important PCIC dimensions. Of these, four were agreed upon by  
34 all participants: accessibility, minimising cost, information and education, and staff attitudes and  
35 communication. The remaining five dimensions were staff competence, physical comfort, privacy,  
36 psychological and emotional support, and continuity and coordination of care. The concept of PCIC  
37 was related to three major contributors: participants' demographics, patient experience with infertility  
38 care, and health seeking behaviour (HSB). Applying PCIC dimensions on Maslow's hierarchy revealed  
39 that participants were still in the deficiency zone, which could possibly explain the differences between  
40 Arab and European models.

41 **Conclusion:** We found clear differences between the Arab and the European PCIC model. Arab  
42 infertile women are still having many basic unmet needs. The current study provided PCIC dimensions  
43 and items, which can be used to improve the quality of Arab infertility care.

44 **Keywords:** Patient-centred care, infertility, women's health services, Arab world

## 46 ARTICLE SUMMARY

### 47 Strengths and limitations of this study

- 48 • This study may become a reference for the concept of patient-centered infertility care in the  
49 Arab world and helps to improve the quality of infertility care.
- 50 • The current study showed the possible association of PCIC and HSB which has not been  
51 studied in the literature.
- 52 • Our study was limited by being conducted in a single city. Collecting data from across the  
53 Arab world would be more representative.

## 57 INTRODUCTION

58 Infertility is a worldwide public health concern.[1] Globally, the estimated infertility rate is between  
59 3·5% to 26·4%; however, the burden is higher in developing countries, where approximately one in four  
60 couples is affected.[2-4]

61 The infertility care journey is invariably long and full of emotional and psychosocial stress.[5 6] Couples  
62 experiencing infertility frequently face difficult access to infertility care—especially assisted  
63 reproductive technologies—as access varies widely among countries and regions, and is lowest in lower  
64 and middle income countries.[7]

65 Previously, conceptualisations of infertility care quality focused on outcome measures.[8 9] However,  
66 this is changing, as patient-centred care (PCC) is increasingly recognised as important for infertility care  
67 quality.[10-12] Patient-centred infertility care (PCIC) was studied among European couples experiencing  
68 infertility,[13 14] and the following ten dimensions were identified: information provision, competence  
69 of clinic and staff, continuity and transition, coordination and integration, accessibility, physical comfort,  
70 attitude of and relationship with staff, communication, patient involvement and privacy, and emotional  
71 support.[10 13] These served as the basis for the Patient-Centredness Questionnaire-Infertility, validated  
72 for use among European populations.[12]

73 A literature review conducted in 2017 failed to define PCIC from the perspective of Arab patients  
74 experiencing infertility; thus, the question remained unanswered.[15] What was validated in Europe  
75 might not be in the Arab world, due to regional and cultural differences believed to affect infertility care,  
76 including counselling and treatment modalities.[16] Thus, we aimed to explore the concept of PCIC  
77 among Arab women experiencing infertility in Saudi Arabia.

78

1  
2  
3 79 **METHODS**

4  
5 80 **Design**

6  
7 81 This is a qualitative study using in-depth interviews (IDIs) to explore the concept of PCIC from the  
8  
9 82 perspective of women experiencing infertility.

10  
11  
12 83 **Study population**

13  
14  
15 84 Between January 2017 and December 2018, we conducted IDIs in Jeddah, Saudi Arabia. Inclusion  
16  
17 85 criteria were Arab women who received medical treatment for infertility during the six months  
18  
19 86 preceding the interview, at any hospital in Jeddah. A purposive sample of 14 women was included,  
20  
21 87 with maximum variation. The aim behind maximum variation sampling was to gain greater insight into  
22  
23 88 PCIC by viewing it from different angles. Variations included age group, level of education,  
24  
25 89 occupation, duration of marriage and infertility, infertility type, number of living children, treatment  
26  
27 90 used, health facility visited, and duration of seeking infertility care. Participants were recruited  
28  
29 91 purposefully until data saturation was reached and no new themes emerged.

30  
31 92 **Data collection and analysis**

32  
33  
34 93 We conducted IDIs via telephone. IDIs length ranged from 45 to 90 minutes. All IDIs were conducted  
35  
36 94 by a female researcher, family physician with experience in qualitative data collection (HHW). We  
37  
38 95 used IDI guide to collect data flexibly. The researcher started by introducing herself as a researcher and  
39  
40 96 family physician interested in patient-centered care. Then the consent was obtained including clear  
41  
42 97 explanation of the aim of study for each participant. The IDI guide consisted of 2 parts; part one  
43  
44 98 included participants' characteristics, part two included a question regarding medical care received,  
45  
46 99 followed by six open-ended questions regarding PCIC (Supplementary file 1). We used probing  
47  
48 100 questions as needed. Each interview was audio recorded, transcribed verbatim, translated from Arabic  
49  
50 101 to English, then imported to NVivo version 12 for analysis.

51  
52 102 We used inductive coding thematic analysis, as patient centeredness had not been defined from Arab  
53  
54 103 patients' perspectives. We described, compared, and related findings throughout data analysis. The first  
55  
56 104 step in the analysis was reading and re-reading the transcripts several times, to become familiar with  
57  
58 105 emerging data. At this stage, we made hand notes summarising the main points and our early  
59  
60 106 impressions. These notes focused on mapping patients' experiences with infertility care and their

1  
2  
3 107 definitions of PCIC (Supplementary file 2). Next, we (HHW & TATI) used line-by-line coding  
4  
5 108 independently for each IDI. We continuously developed and modified the codes during IDI analysis.  
6  
7 109 When we completed coding for five IDIs, we discussed and modified the codes before moving forward.  
8  
9 110 Discrepancies were discussed until consensus was reached. If no consensus was reached, we discussed  
10  
11 111 that point with the third author (SBI). Then, we categorised codes into preliminary subthemes and  
12  
13 112 themes.

14  
15 113 We reached saturation after 14 IDIs, and derived around 148 codes. We continuously reviewed and  
16  
17 114 modified our preliminary themes until we developed the final themes. Matrix queries produced by  
18  
19 115 NVivo were used to display the frequency of codes occurring within the text, or of codes and  
20  
21 116 participants' characteristics. This matrix allowed us to assess the degree of agreement among  
22  
23 117 participants and the nature of the associations.

24  
25  
26 118 We adopted four methods to enhance validity. First, we assessed different aspects of the same concept.  
27  
28 119 The IDI guide included six questions about PCIC; however, they were worded differently by asking  
29  
30 120 about participants' positive and negative perceptions of care experience, what they needed from  
31  
32 121 infertility care, what would be an optimal situation, and, finally, a direct question about participants'  
33  
34 122 definitions of PCIC. Second, source triangulation was used by ensuring maximum variations in the  
35  
36 123 sample to explore PCIC from different viewpoints. Additionally, two gynaecologists were asked about  
37  
38 124 concerns in infertility care addressed by participants, such as wait times and financial aspects. In  
39  
40 125 addition, after completing data analysis, we compared PCIC dimensions from the current study with  
41  
42 126 those identified by European participants, the only available PCIC dimensions from patients'  
43  
44 127 perspectives before our research. Third, we used analyst triangulation, with three analysts involved in  
45  
46 128 reviewing the findings. Fourth, we used respondents' validation. After data analysis, we sent  
47  
48 129 participants a summary of the PCIC dimensions and their items. All agreed the dimensions they  
49  
50 130 preferred were included. Two respondents stressed on avoiding long wait times and providing  
51  
52 131 appropriate appointments for the purpose of follow-up visits. The results are reported according to  
53  
54 132 Consolidated Criteria for Reporting Qualitative Research (COREQ)[17] (Supplementary file 3).

55 133 **Patient and public involvement** Patients and/or the public were involved in the conduct, and reporting  
56  
57 134 of this research. Refer to the Methods section for further details.

58  
59  
60 135



1  
2  
3 **136 RESULTS**

4  
5 **137** Table 1 shows participants' characteristics. Thematic analysis provided three themes: (1) PCIC  
6  
7 **138** dimensions, (2) PCIC definition and patient experience, and (3) PCIC and health seeking behaviour  
8  
9 **139** (HSB). The third theme included subthemes. As shown in Figure 1, there was interaction between  
10  
11 **140** participants' definitions of PCIC and patient experience, HSB, and their sociodemographic  
12  
13 **141** characteristics.

14  
15  
16 **Table 1: Characteristics of participants involved in in-depth interviews (n=14)**

| Participant characteristics                |                                   | Number(%)   |
|--------------------------------------------|-----------------------------------|-------------|
| Age, year                                  | 25-                               | 5 (35·71%)  |
|                                            | 30-                               | 3 (21·43%)  |
|                                            | 35-                               | 3 (21·43%)  |
|                                            | 40-45                             | 3 (21·43%)  |
| Residency                                  | Jeddah                            | 10 (71·43%) |
|                                            | Out of Jeddah                     | 4 (28·57%)  |
| Duration of marriage, year                 | 1-                                | 7 (50·00%)  |
|                                            | 5-                                | 3 (21·43%)  |
|                                            | 10-                               | 1 (7·14%)   |
|                                            | 15-20                             | 3 (21·43%)  |
| Duration of infertility, year              | 1-                                | 7 (50·00%)  |
|                                            | 3-                                | 5 (35·71%)  |
|                                            | 6-                                | 1 (7·14%)   |
|                                            | 9-                                | 1 (7·14%)   |
| Duration of seeking infertility care, year | 1-                                | 8 (57·14%)  |
|                                            | 3-                                | 4 (28·57%)  |
|                                            | 6-                                | 2 (14·29%)  |
| Number of living                           | 0                                 | 8 (57·14%)  |
|                                            | 1 or 2                            | 5 (35·71%)  |
|                                            | 3 or more                         | 1 (7·14%)   |
| Type of infertility                        | Primary                           | 5 (35·71%)  |
|                                            | Secondary                         | 9 (64·29%)  |
| Pregnant now                               | Yes                               | 2 (14·29%)  |
|                                            | No                                | 12 (85·71%) |
| Type of treatment used                     | Medical (OI*, hyperprolactinemia) | 13 (92·86%) |
|                                            | IUI†                              | 1 (7·14%)   |
|                                            | ICSI/IVF‡                         | 3 (21·43%)  |
|                                            | Surgical                          | 6 (42·86%)  |

142  
143

\*OI; ovulation induction, †IUI; intrauterine insemination, ‡ICSI/IVF; Intracytoplasmic sperm injection/in-vitro fertilization.

14  
15  
16  
17  
18  
19  
20  
21  
22  
23  
24  
25  
26  
27  
28  
29  
30  
31  
32  
33  
34  
35  
36  
37  
38  
39  
40  
41  
42  
43  
44  
45  
46  
47  
48  
49  
50  
51  
52  
53  
54  
55  
56  
57  
58 **143 PCIC dimensions**  
59  
60

144 We identified nine PCIC dimensions from 14 IDIs. Table 2 summarises the dimensions and each of  
 145 their items, ordered following a logical stream, similar to what patients experience during infertility  
 146 care.

**Table 2: Patient-centred infertility care (PCIC) dimensions from Arab infertile women perspective**

| PCIC dimensions                                                          | PCIC items                                                                        |
|--------------------------------------------------------------------------|-----------------------------------------------------------------------------------|
| Accessibility                                                            | Availability of appropriate appointments                                          |
|                                                                          | Ease of access to the health care facility                                        |
|                                                                          | Smoothness of the process of booking appointment, registration & workflow         |
|                                                                          | Justice in handling appointments & patient access                                 |
|                                                                          | Providing easy access to doctors through phone & online consultations             |
|                                                                          | Short wait time                                                                   |
| Minimising cost                                                          | Vacancy (no overcrowding)                                                         |
|                                                                          | Covering infertility care cost by insurance                                       |
|                                                                          | Provision of infertility management in public sector free of charge               |
| Physical comfort                                                         | Providing infertility care at reasonable, affordable cost                         |
|                                                                          | Cleanliness                                                                       |
|                                                                          | Comfortable environment                                                           |
|                                                                          | Assistance and provision of care                                                  |
|                                                                          | Pain avoidance and relieve                                                        |
| Privacy                                                                  | Single dose, less frequent medication doses                                       |
|                                                                          | Providing care in special department for women & infertility                      |
|                                                                          | Providing female doctors or examiners                                             |
|                                                                          | Avoiding over or unnecessarily exposing intimate parts of patient's body          |
|                                                                          | Considering differences in privacy mean from patient to another                   |
|                                                                          | Ensuring minimal interruption and number of people in, no men or other patients   |
|                                                                          | Taking patient permission before allowing more people in                          |
|                                                                          | Preferring nobody knows about patient's infertility issues                        |
| Considering differences in the preferences regarding husband involvement |                                                                                   |
| Staff attitude and communication                                         | Treating patient and other staff with dignity and respect                         |
|                                                                          | Staff truthfulness                                                                |
|                                                                          | Avoiding materialistic behaviour                                                  |
|                                                                          | Practicing medicine in love and dedication                                        |
|                                                                          | Being so patient                                                                  |
|                                                                          | Religious approach                                                                |
| Staff competence                                                         | well-known doctors                                                                |
|                                                                          | Proper and accurate evaluation; history, examination and investigations as needed |
|                                                                          | Understanding the patient fast and well                                           |
|                                                                          | Providing diagnosis and curative solutions                                        |
|                                                                          | Avoiding medications with bad side effects                                        |
|                                                                          | Providing comprehensive and personalized care                                     |
| Qualification                                                            |                                                                                   |

(Table 2 continues on next page)

| <b>PCIC dimensions</b>                      | <b>PCIC items</b>                                                                                                                                             |
|---------------------------------------------|---------------------------------------------------------------------------------------------------------------------------------------------------------------|
| Information and education                   | Giving and taking, encouraging discussion and negotiation.                                                                                                    |
|                                             | Providing relevant information about the patient status, progress, and prognosis.                                                                             |
|                                             | Disclosure and clarification of all treatment options.                                                                                                        |
|                                             | Providing information on processes of care before each step, what to expect before, during and after procedures, then home care, plan of care, and follow up. |
|                                             | Informing patient about the use, expected effects, and possible side effects before starting treatment                                                        |
|                                             | Providing relevant information with adequate explanation                                                                                                      |
|                                             | Talking to patients with simple understandable language                                                                                                       |
|                                             | Welcoming patient questions and providing answers thought health care journey.                                                                                |
|                                             | Raising health awareness and education through school education, doctors in clinics, and campaigns                                                            |
|                                             | Considering the patient's long experience as an expert in her case                                                                                            |
| Psychological and emotional support         | Listening to patients                                                                                                                                         |
|                                             | Considering the patient's personal situation                                                                                                                  |
|                                             | Preparing patient psychologically throughout her treatment journey                                                                                            |
|                                             | Giving patient realistic hope                                                                                                                                 |
|                                             | Avoiding using destroying words or attitude, or pointing finger at the patient                                                                                |
|                                             | Ensuring ongoing support and motivation                                                                                                                       |
| Continuity and coordination of care         | Studying the patient case well including proper documentation and up to date file review                                                                      |
|                                             | Treating couple as one case                                                                                                                                   |
|                                             | Developing and sharing detailed plan of care from the start                                                                                                   |
|                                             | Ongoing planning, follow up and coordination of care hand on hand with the patient based on health situations and patient needs                               |
|                                             | Providing follow up with the same doctor                                                                                                                      |
|                                             | Including doctors from same specialty and other specialties as needed                                                                                         |
|                                             | Facilitating the shortest treatment journey                                                                                                                   |
| Encouraging lady's check-up before marriage |                                                                                                                                                               |

147

148 All participants mentioned four dimensions as important elements of PCIC: accessibility (short wait  
149 times), minimising cost (providing infertility care at a reasonable, affordable cost), information and  
150 education (providing relevant information with adequate explanation), and staff attitudes and  
151 communication (treating patients and other staff with dignity and respect). Information from  
152 obstetricians/gynaecologists supported participants' perspectives regarding wait times and costs.  
153 Despite being noted as important dimensions, participants' preferences varied regarding maximum wait  
154 times, relevant information, and privacy during infertility care. These preferences were affected to  
155 some extent by participants' educational level, infertility care experience, and marital relationship  
156 quality. Table 3 compares these dimensions with the European PCIC model.

**Table 3: Comparison between the Arab and European Patient-centered infertility care (PCIC) dimensions**

| Arab PCIC dimensions                   | European PCIC dimensions                                          |
|----------------------------------------|-------------------------------------------------------------------|
| 1. Accessibility                       | 1. Accessibility                                                  |
| 2. Minimizing cost*                    | ..                                                                |
| 3. Physical comfort                    | 2. Physical comfort                                               |
| 4. Privacy                             | 3. Patient involvement* and privacy                               |
| 5. Staff attitude and communication    | 4. Attitude of and relationship with staff                        |
|                                        | 5. Communication                                                  |
| 6. Staff competence                    | 6. Competence of clinic and staff                                 |
| 7. Information and education           | 7. Information provision                                          |
| 8. Psychological and emotional support | 8. Emotional support                                              |
| 9. Continuity and coordination of care | 9. Coordination and integration,<br>10. continuity and transition |

\*Indicates the dimension mentioned in one model only

157

**158 PCIC definition and patient experience**

159 When asked to define PCIC, participants provided short definitions focused on a few points, although  
 160 they mentioned much more during the preceding questions about their infertility care experience. The  
 161 panel (Supplementary file 4) shows participants' definitions of PCIC and summarises each participant's  
 162 experience.

163 Most participants had a dominant issue during infertility care. These issues were related to the medical  
 164 care itself or sociodemographic circumstances. Participant experience was found to shape participants'  
 165 definitions of PCIC the most, as shown in the panel.

**166 PCIC and HSB**

167 PCIC dimensions showed influences on participants' HSB, suggested by the following HSB  
 168 subthemes.

169 1. Self-medication

1  
2  
3 170 Participants practiced two methods of self-medication: using medications illegally, and using  
4  
5 171 traditional or herbal medicines.

6  
7  
8 172 The first method is not a responsible form of self-medication, based on WHO's definition [18]. One  
9  
10 173 patient used ovulation induction medications (Clomiphene citrate tablets, Menotropin injections,  
11  
12 174 Choriomon injections) in high doses, reaching double the dosage prescribed by her physicians. All  
13  
14 175 were prescription-only medications.

15  
16 176 *I used to order images for myself for ovulation. I knew the size of the egg, they (doctors) got annoyed!*  
17  
18 177 *Yes, I got the image and ask for a trigger shot, because sometimes we had a relation before meeting the*  
19  
20 178 *doctor. I wanted to know, but sometimes you do not find the answer you are looking for....Now I knew,*  
21  
22 179 *if the egg was more than 15, I should take the trigger shot',* Participant 10, secondary infertility

23  
24  
25 180 She did not ask her doctors to increase the dose, because she felt they were 'fed up' with her many  
26  
27 181 questions and requests. Additionally, appointments were far; therefore, if she waited to meet her  
28  
29 182 physician each time to get the prescription, she would have very long treatment journey.

30  
31  
32 183 For the second method, most participants (12 out of 14) used traditional and/or herbal medicine during  
33  
34 184 infertility care. Remedies included herbs, honey, cupping therapy (Hijamah), massage, and Qur'anic  
35  
36 185 verses read to achieve some betterment (Roqia). Participants had different attitudes towards this kind of  
37  
38 186 medicine. Some preferred it over modern medicine, as they believed modern medicines to be harmful  
39  
40 187 chemicals, while traditional medicine is natural, and therefore harmless. Others were cautious with  
41  
42 188 herbs, as safe and effective dosage is unknown. The majority preferred to use both traditional and  
43  
44 189 modern medicine, as traditional medicine is safe and accessible, and modern medicine failed to solve a  
45  
46 190 number of their infertility problems.

## 47 191 2. Doctor shopping

48  
49  
50 192 Some participants would visit more than one infertility doctor for the same complaint, during the same  
51  
52 193 time period. Participant 8 used to seek four different doctors' opinions before any procedure, to make  
53  
54 194 sure it was the correct decision. This patient had recurrent pregnancy loss, and discovered she was not  
55  
56 195 examined properly, which eventually cost her a lot of money in diagnosing and treating the cause.

57  
58 196 Participant 12 was following up with an infertility doctor, then decided to shift to another doctor after  
59  
60 197 failed IVF, due to low sperm quality. The reason was a lack of honesty, as this participant knew

1  
2  
3 198 indirectly after her failed IVF procedure there was a high possibility of IVF failure; however, the  
4  
5 199 physician did not disclose that. Additionally, participants sought second opinions while still following  
6  
7 200 up with their primary physicians because their physician did not give a contact number, provided  
8  
9 201 inadequate information, or did not disclose all available options. Some women changed physicians, or  
10  
11 202 even hospitals, due to failure to provide a clear plan from the start, failure to reach a diagnosis and  
12  
13 203 order important tests, doctors' offensive behaviour, poor communication, or physical discomfort.

### 15 204 3. Stopping infertility care

17  
18 205 Some participants stopped seeking infertility care, although they still needed it. Women can face many  
19  
20 206 obstacles during infertility care, and they commonly try to overcome these obstacles to get pregnant.  
21  
22 207 The major obstacle that led participants to stop seeking care was cost, which was described as  
23  
24 208 'horrible.' Other obstacles, such as lack of support and cooperation from husbands, also contributed,  
25  
26 209 but did not lead to complete discontinuation.

27  
28  
29 210 *'Images and tests and so-on!! we paid a large sum of money! And not covered by insurance... Actually,*  
30  
31 211 *the cost should not be huge. It should not be purely materialistic'*, Participant 13, primary infertility.

### 33 212 4. Avoiding public hospitals and preferring expensive private care

34  
35  
36 213 Although cost was a major barrier to accessing infertility care, several participants surprisingly chose to  
37  
38 214 seek care in the expensive private sector. The reasons included poor environment in government  
39  
40 215 hospitals, difficulty booking appropriate appointments, and long wait times. An important factor was  
41  
42 216 unavailability of infertility units and important services (e.g. IVF) in general government hospitals.  
43  
44 217 Therefore, couples experiencing infertility received care in the general obstetrics/gynaecology clinics.

45  
46 218 *'So, I never mind paying the blood of my heart (all what I have) to go to a place where I'm comfortable*  
47  
48 219 *psychologically while I'm receiving care, in order to not end up with a bad experience or a bad smell*  
49  
50 220 *in my memory (the bad smell in some low quality hospitals)'*, Participant 5, primary infertility.

### 53 221 5. Seeking care from unqualified therapists, which could cause harm

54  
55  
56 222 Participants sought care from unknown individuals who posted on social media. Participant 10  
57  
58 223 followed a woman on Instagram who posted prescriptions related to an ovulation induction technique  
59  
60 224 composed of three drugs. Participant 12 received an advertisement online from a person claiming to

1  
2  
3 225 have medicines not available in Saudi Arabia that he could ship at a high cost. That medicine was not  
4  
5 226 licensed by the FDA and not sold in pharmacies anywhere. Participant 7 visited an unlicensed massage  
6  
7 227 therapist who claimed she could correct the position of one's womb. These behaviours were attributed  
8  
9 228 to the failure of physicians to reach a diagnosis or successfully treat the problem. Furthermore, the  
10  
11 229 unqualified individuals tended to communicate well, take a detailed history, provide adequate  
12  
13 230 information, and were easy to access and highly responsive.

14  
15 231 *'Imagine, he asked me questions I'd never been asked by any of the doctors I'd visited here!'*

16  
17 232 Participant 12, primary infertility.

18  
19  
20 233 6. Seeking care despite dissatisfaction with services

21  
22  
23 234 Achieving some dimensions of PCIC ameliorated the absence of others, thereby encouraging  
24  
25 235 participants to seek care, such as a doctor's competence and communication skills. Many participants  
26  
27 236 visited an infertility care facility they did not like because they were looking for specific physicians.  
28  
29 237 Thus, a good doctor's communication skills and competence supported seeking infertility care and  
30  
31 238 encouraged participants to temporarily ignore physical discomfort.

## 32 33 239 **DISCUSSION**

34  
35 240 In the current study, PCIC was defined across nine dimensions, from the perspectives of Arab women  
36  
37 241 experiencing infertility. All participants agreed on four dimensions: accessibility, minimising costs,  
38  
39 242 information and education, and staff attitudes and communication. The five remaining dimensions were  
40  
41 243 staff competence, physical comfort, privacy, continuity and coordination of care, and psychological and  
42  
43 244 emotional support. PCIC was found to have three major contributors: participants' demographics,  
44  
45 245 patient experience with infertility care, and HSB.

46  
47 246 Comparing these PCIC dimensions with those developed by Dancet and colleagues from across Europe  
48  
49 247 (European PCIC-model) [14], we found them to be similar to some extent (Table 3). There were  
50  
51 248 substantial differences, however. First, minimising cost was highly valued by our participants, but  
52  
53 249 absent in the European model. Similarly, patient involvement in the European model was not  
54  
55 250 mentioned by our participants. Second, prioritisation of the dimensions differed. For example,  
56  
57 251 accessibility, a dimension agreed upon by all our participants, was among the least prioritised by  
58  
59 252 European participants. Third, even dimensions included in both models showed some differences in  
60

1  
2  
3 253 preferences and needs between Arab and European groups. For example, concerning provision of  
4  
5 254 information, our participants focused on deficient information during treatment at the health facility;  
6  
7 255 however, the European model included the more ambitious addition of receiving information on media.  
8  
9 256 These three differences reflect Arab women's low expectations, compared to European women. They  
10  
11 257 mainly focused on unmet needs, which shaped the majority of PCIC definitions in our study.

12  
13 258 Maslow's hierarchy of needs explains this pattern well [19]. It is a motivational theory comprising a  
14  
15 259 five-tier model of human needs; needs lower in the hierarchy must be satisfied before individuals can  
16  
17 260 attend to higher needs. These needs are divided into deficiency (basic) needs (physiological, safety,  
18  
19 261 love and belonging, and esteem) and growth needs (self-actualisation). Self-actualised people use their  
20  
21 262 full potential [19]. Figure 2 shows Maslow's hierarchy of needs, as adapted to PCIC. Notably, it was  
22  
23 263 difficult to sort dimensions by need categories when adapting Maslow's hierarchy to PCIC, as each  
24  
25 264 dimension could include a mixture of deficiency and growth needs. For example, information provision  
26  
27 265 could be a basic need (e.g. how to use a medication) or a growth need (e.g. detailed knowledge on IVF  
28  
29 266 procedures to facilitate decision-making). The hierarchy indicates that participants focused on  
30  
31 267 deficiency needs, as all nine dimensions are within the deficiency needs zone and did not reach self-  
32  
33 268 actualisation. IDI transcripts showed low expectations among participants, with few exceptions. Based  
34  
35 269 on Maslow's hierarchy, this indicates participants' deficiency needs were not covered, and they  
36  
37 270 continued to struggle to receive infertility care. Thus, PCIC is expected to help Arab women  
38  
39 271 experiencing infertility satisfy their deficiency needs and become motivated to achieve self-  
40  
41 272 actualisation, thereby empowering them to participate in infertility care.

42  
43 273 The current study found that PCIC definition was shaped by the patient experience with infertility care.  
44  
45 274 This finding indicates that this definition is dynamic and not static. The patient can give different  
46  
47 275 preferences if the concept was explored at different periods of time.

48  
49 276 To the best of our knowledge, this is the first study that showed a possible association between PCC  
50  
51 277 and HSB. Generally, seeking infertility medical care has been shown to relate to prior experience with  
52  
53 278 doctors [20]. In line with our findings, self-medication has been associated with some dimensions of  
54  
55 279 PCC, including accessibility (especially lack of insurance coverage) [21 22], knowledge [23], physical  
56  
57 280 comfort [23], and dissatisfaction with health care providers [18]. Huppelschoten and colleagues found  
58  
59 281 no relation of PCIC with drop-out [24]. Our findings suggested the opposite, as PCIC was found to  
60



1  
2  
3 282 relate to discontinuation of treatment and changing doctors or hospitals. Sansone and Sansone  
4  
5 283 supported that inconvenient clinician factors promote doctor shopping [25]. Unlike other forms of  
6  
7 284 HSB, we found that using traditional and spiritual treatments was related to beliefs and preferences  
8  
9 285 over conventional medicine, in line with previous literature [20 26 27].

## 11 286 **Limitations**

12  
13  
14 287 Regarding limitations, our study was conducted in a single city. Collecting data from across Saudi  
15  
16 288 Arabia, or more than one country in the Arab world, was infeasible due to a lack of funding. The  
17  
18 289 current study highlighted the possible effect of PCIC on HSB; however, we could not prove this  
19  
20 290 association due to the nature of qualitative research. Future quantitative studies are needed to confirm  
21  
22 291 the association and, if proven, to consider HSB as an indicator of PCIC. We hope this study will  
23  
24 292 prompt further research regarding PCIC in the Arab World, thereby improving the quality of infertility  
25  
26 293 care and quality of life for women who experience infertility. Our study developed a list of PCIC  
27  
28 294 dimensions and items, but did not include a tool to measure PCIC. Thus, further work is recommended  
29  
30 295 to develop a validated tool for measuring PCIC from Arab patients' perspectives.

## 31 296 **Acknowledgement**

32  
33  
34  
35 297 We would like to thank the women and gynaecologist who participated in the study. We also thank  
36 298 Editage editors for editing our manuscript.

## 37 299 **Author Contributions**

38  
39 300 HHW, TATI, and SBI contributed to the study design. HHW and AJK collected the data. HHW, TATI,  
40 301 SBI, and AJK performed data analysis and interpretation. HHW wrote the first draft of the article and  
41 302 all authors contributed to subsequent revisions.

42  
43 303 **Funding** This research received no specific grant from any funding agency in the public, commercial  
44 304 or not-for-profit sectors.

45  
46 305 **Competing interests** None declared.

47  
48 306 **Patient and public involvement** Patients were involved in the conduct, and reporting of this research.  
49 307 Refer to the Methods section for further details.

50  
51 308 **Patient consent for publication** Not required.

52  
53  
54 309 **Ethics approval** The study proposal was reviewed and approved by the Human Research and Ethics  
55 310 Committee at Universiti Sains, in Malaysia (No. USM/JEPeM/15020056, Date 03/11/2015). The study  
56 311 was performed in accordance with the ethical standards as laid down in the 1964 Declaration of  
57 312 Helsinki and its later amendments. Informed consent was obtained from all participants. Respondents'  
58 313 privacy and confidentiality were assured.

59  
60 314 **Provenance and peer review:** Not commissioned; externally peer reviewed.

1  
2  
3 315 **Data availability statement:** Extra data is available by emailing HHW.  
4

5 316 **Supplementary data**

6  
7 317 Supplementary file 1, in-depth interview guide  
8

9  
10 318 Supplementary file 2, patient's experience mapping, an example  
11

12 319 Supplementary file 3, COREQ checklist for qualitative research  
13

14  
15 320 Supplementary file 4, quotations showing participants' definitions of patient-centred infertility care  
16

17 321 (PCIC) and dominant events in each patient's experience  
18

19 322 **Figures:**

20  
21  
22 323 Fig.1 Diagram shows the interaction between PCIC definition and patient experience, psychosocio-  
23

24 324 demographic features, and health seeking behaviour (rectangles)  
25

26 325 Fig.2 Maslow's Hierarchy of Patient-centered infertility care (PCIC)  
27

28  
29 326  
30  
31  
32  
33  
34  
35  
36  
37  
38  
39  
40  
41  
42  
43  
44  
45  
46  
47  
48  
49  
50  
51  
52  
53  
54  
55  
56  
57  
58  
59  
60

327 **References**

- 328 1. Macaluso M, Wright-Schnapp TJ, Chandra A, et al. A public health focus on infertility prevention,  
329 detection, and management. *Fertil Steril* 2010;93(1):16.e1-10. doi:  
330 10.1016/j.fertnstert.2008.09.046 [published Online First: 2008/11/11]
- 331 2. WHO. Sexual and reproductive health: Infertility is a global public health issue [Internet].  
332 [Available from: <https://www.who.int/reproductivehealth/topics/infertility/perspective/en/>  
333 (accessed Nov 10, 2019).
- 334 3. Mascarenhas MN, Flaxman SR, Boerma T, et al. National, regional, and global trends in infertility  
335 prevalence since 1990: a systematic analysis of 277 health surveys. *PLoS Med*  
336 2012;9(12):e1001356.
- 337 4. Lemoine M-E, Ravitsky V. Toward a Public Health Approach to Infertility: The Ethical Dimensions  
338 of Infertility Prevention. *Public Health Ethics* 2013;6(3):287-301. doi: 10.1093/phe/pht026
- 339 5. Alesi R. Infertility and its treatment-an emotional roller coaster. *Aust J Gen Pract* 2005;34(3):135.
- 340 6. Huppelschoten AG, Nelen WL, Westert GP, et al. Improving patient-centredness in partnership with  
341 female patients: a cluster RCT in fertility care. *Human reproduction (Oxford, England)*  
342 2015;30(5):1137-45. doi: 10.1093/humrep/dev041 [published Online First: 2015/03/10]
- 343 7. Adamson GD, de Mouzon J, Chambers GM, et al. International Committee for Monitoring Assisted  
344 Reproductive Technology: world report on assisted reproductive technology, 2011. *Fertil*  
345 *Steril* 2018;110(6):1067-80. doi: 10.1016/j.fertnstert.2018.06.039 [published Online First:  
346 2018/11/07]
- 347 8. de Mouzon J, Goossens V, Bhattacharya S, et al. Assisted reproductive technology in Europe, 2006:  
348 results generated from European registers by ESHRE. *Human reproduction (Oxford, England)*  
349 2010;deq124.
- 350 9. Nyboe AA, Goossens V, Bhattacharya S, et al. Assisted reproductive technology and intrauterine  
351 inseminations in Europe, 2005: results generated from European registers by ESHRE:  
352 ESHRE. The European IVF Monitoring Programme (EIM), for the European Society of  
353 Human Reproduction and Embryology (ESHRE). *Human reproduction (Oxford, England)*  
354 2009;24(6):1267-87.
- 355 10. Institute of Medicine. Crossing the quality chasm: A new health system for the 21st century.  
356 Washington, DC: National Academies Press 2001.
- 357 11. Dancet E, Nelen W, Sermeus W, et al. The patients' perspective on fertility care: a systematic  
358 review. *Hum Reprod Update* 2010;dmq004.
- 359 12. van Empel IW, Aarts JW, Cohlen BJ, et al. Measuring patient-centredness, the neglected outcome  
360 in fertility care: a random multicentre validation study. *Human reproduction (Oxford,*  
361 *England)* 2010;25(10):2516-26.
- 362 13. Dancet EA, Van Empel IW, Rober P, et al. Patient-centred infertility care: a qualitative study to  
363 listen to the patient's voice. *Human reproduction (Oxford, England)* 2011;26(4):827-33. doi:  
364 10.1093/humrep/der022 [published Online First: 2011/02/15]
- 365 14. Dancet EA, D'Hooghe TM, Sermeus W, et al. Patients from across Europe have similar views on  
366 patient-centred care: an international multilingual qualitative study in infertility care. *Human*  
367 *reproduction (Oxford, England)* 2012;27(6):1702-11. doi: 10.1093/humrep/des061 [published  
368 Online First: 2012/03/20]
- 369 15. Webair HH, Ismail TAT, Ismail SB. Patient-centered infertility care from an Arab perspective: A  
370 review study. *Middle East Fertil Soc J* 2018;23(1):8-13.

- 1  
2  
3 371 16. Lawrenz B, Coughlan C, Melado L, et al. Ethnical and sociocultural differences causing infertility  
4 372 are poorly understood-insights from the Arabian perspective. *Journal of assisted reproduction*  
5 373 *and genetics* 2019;36(4):661-65. doi: 10.1007/s10815-019-01411-2 [published Online First:  
6 374 2019/01/28]
- 7  
8 375 17. Tong A, Sainsbury P, Craig J. Consolidated criteria for reporting qualitative research (COREQ): a  
9 376 32-item checklist for interviews and focus groups. *International journal for quality in health*  
10 377 *care* 2007;19(6):349-57.
- 11  
12 378 18. Alghanim S. Self-medication practice among patients in a public health care system. *East Mediterr*  
13 379 *Health J* 2011;17(5):409-16.
- 14  
15 380 19. Maslow A. Motivation and personality. 2nd ed. New York: Harper and Row 1970.
- 16  
17 381 20. White L, McQuillan J, Greil AL. Explaining disparities in treatment seeking: the case of infertility.  
18 382 *Fertil Steril* 2006;85(4):853-57. doi: <https://doi.org/10.1016/j.fertnstert.2005.11.039>
- 19  
20 383 21. Pagán JA, Ross S, Yau J, et al. Self-medication and health insurance coverage in Mexico. *Health*  
21 384 *Policy* 2006;75(2):170-77. doi: <https://doi.org/10.1016/j.healthpol.2005.03.007>
- 22  
23 385 22. Shaghghi A, Asadi M, Allahverdi-pour H. Predictors of Self-Medication Behavior: A Systematic  
24 386 Review. *Iran J Public Health* 2014;43(2):136-46.
- 25  
26 387 23. Dyer SJ. Infertility-related reproductive health knowledge and help-seeking behaviour in African  
27 388 countries. *ESHRE Monographs* 2008;2008(1):29-33. doi: 10.1093/humrep/den148
- 28  
29 389 24. Huppelschoten AG, van Dongen AJCM, Philipse ICP, et al. Predicting dropout in fertility care: a  
30 390 longitudinal study on patient-centredness. *Human reproduction (Oxford, England)*  
31 391 2013;28(8):2177-86. doi: 10.1093/humrep/det236
- 32  
33 392 25. Sansone RA, Sansone LA. Doctor shopping: a phenomenon of many themes. *Innov Clin Neurosci*  
34 393 2012;9(11-12):42-46.
- 35  
36 394 26. Aydin S, Bozkaya AO, MAZICIOĞLU MM, et al. What influences herbal medicine use?-  
37 395 prevalence and related factors. *Turk J Med Sci* 2008;38(5):455-63.
- 38  
39 396 27. Nahar P. Health seeking behaviour of childless women in Bangladesh: An ethnographic exploration  
40 397 for the special issue on: Loss in child bearing. *Soc Sci Med* 2010;71(10):1780-87. doi:  
41 398 <https://doi.org/10.1016/j.socscimed.2010.07.026>
- 42 399

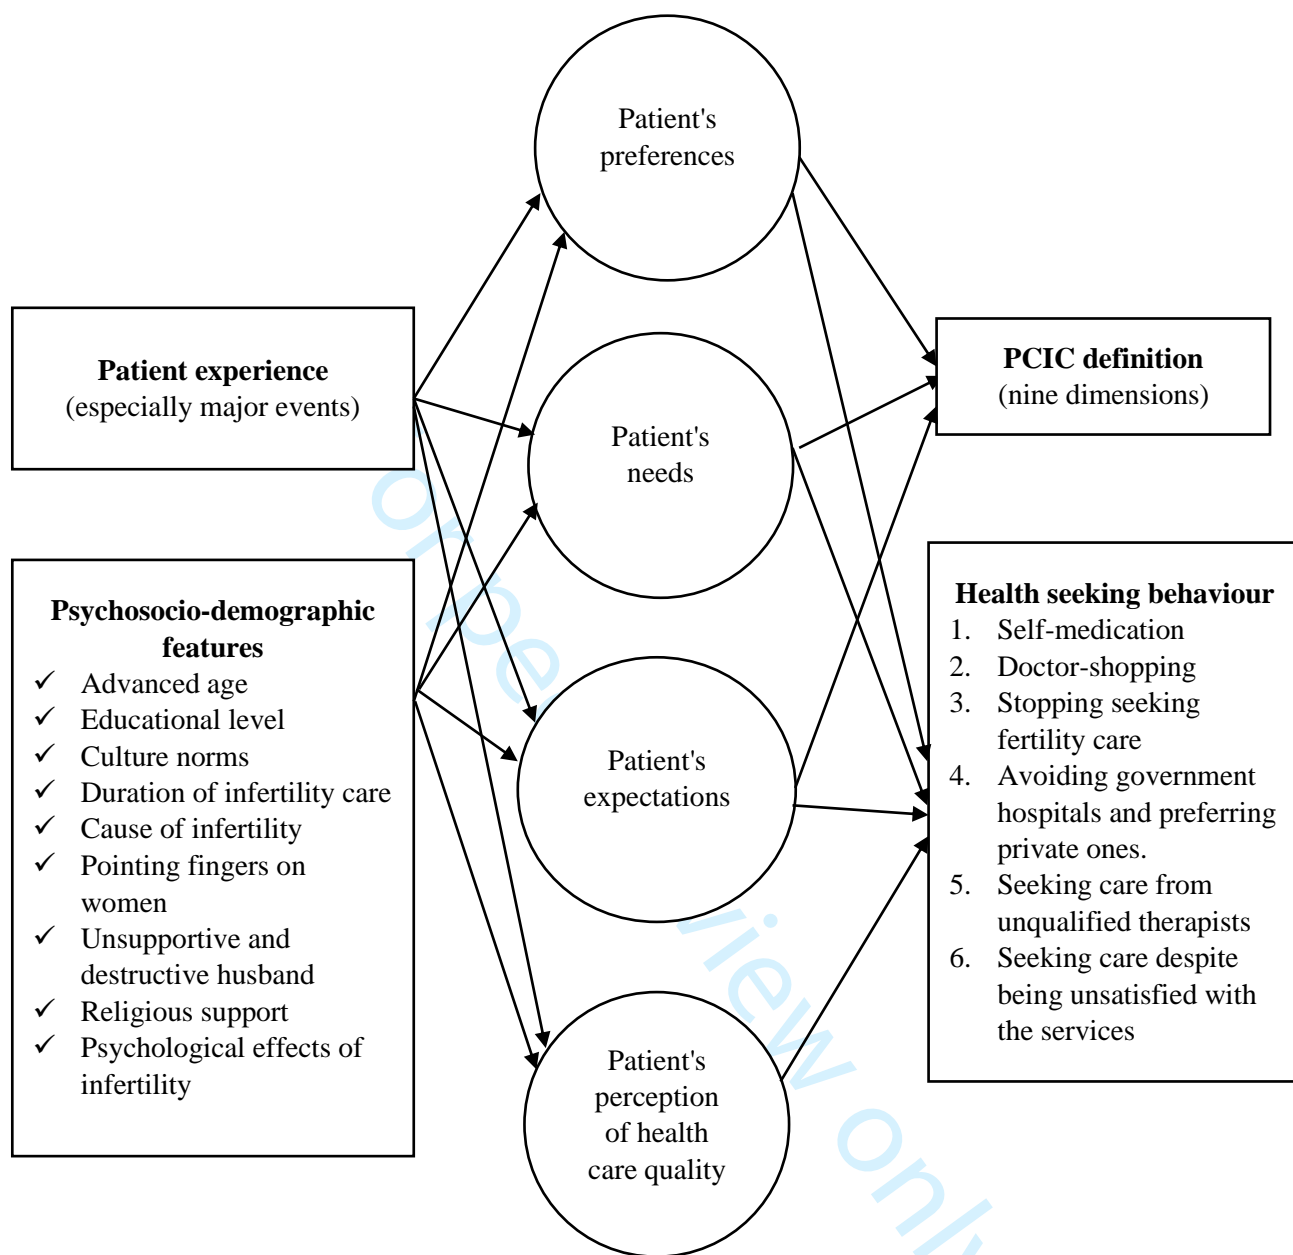

1  
2  
3  
4  
5  
6  
7  
8  
9  
10  
11  
12  
13  
14  
15  
16  
17  
18  
19  
20  
21  
22  
23  
24  
25  
26  
27  
28  
29  
30  
31  
32  
33  
34  
35  
36  
37  
38  
39  
40  
41

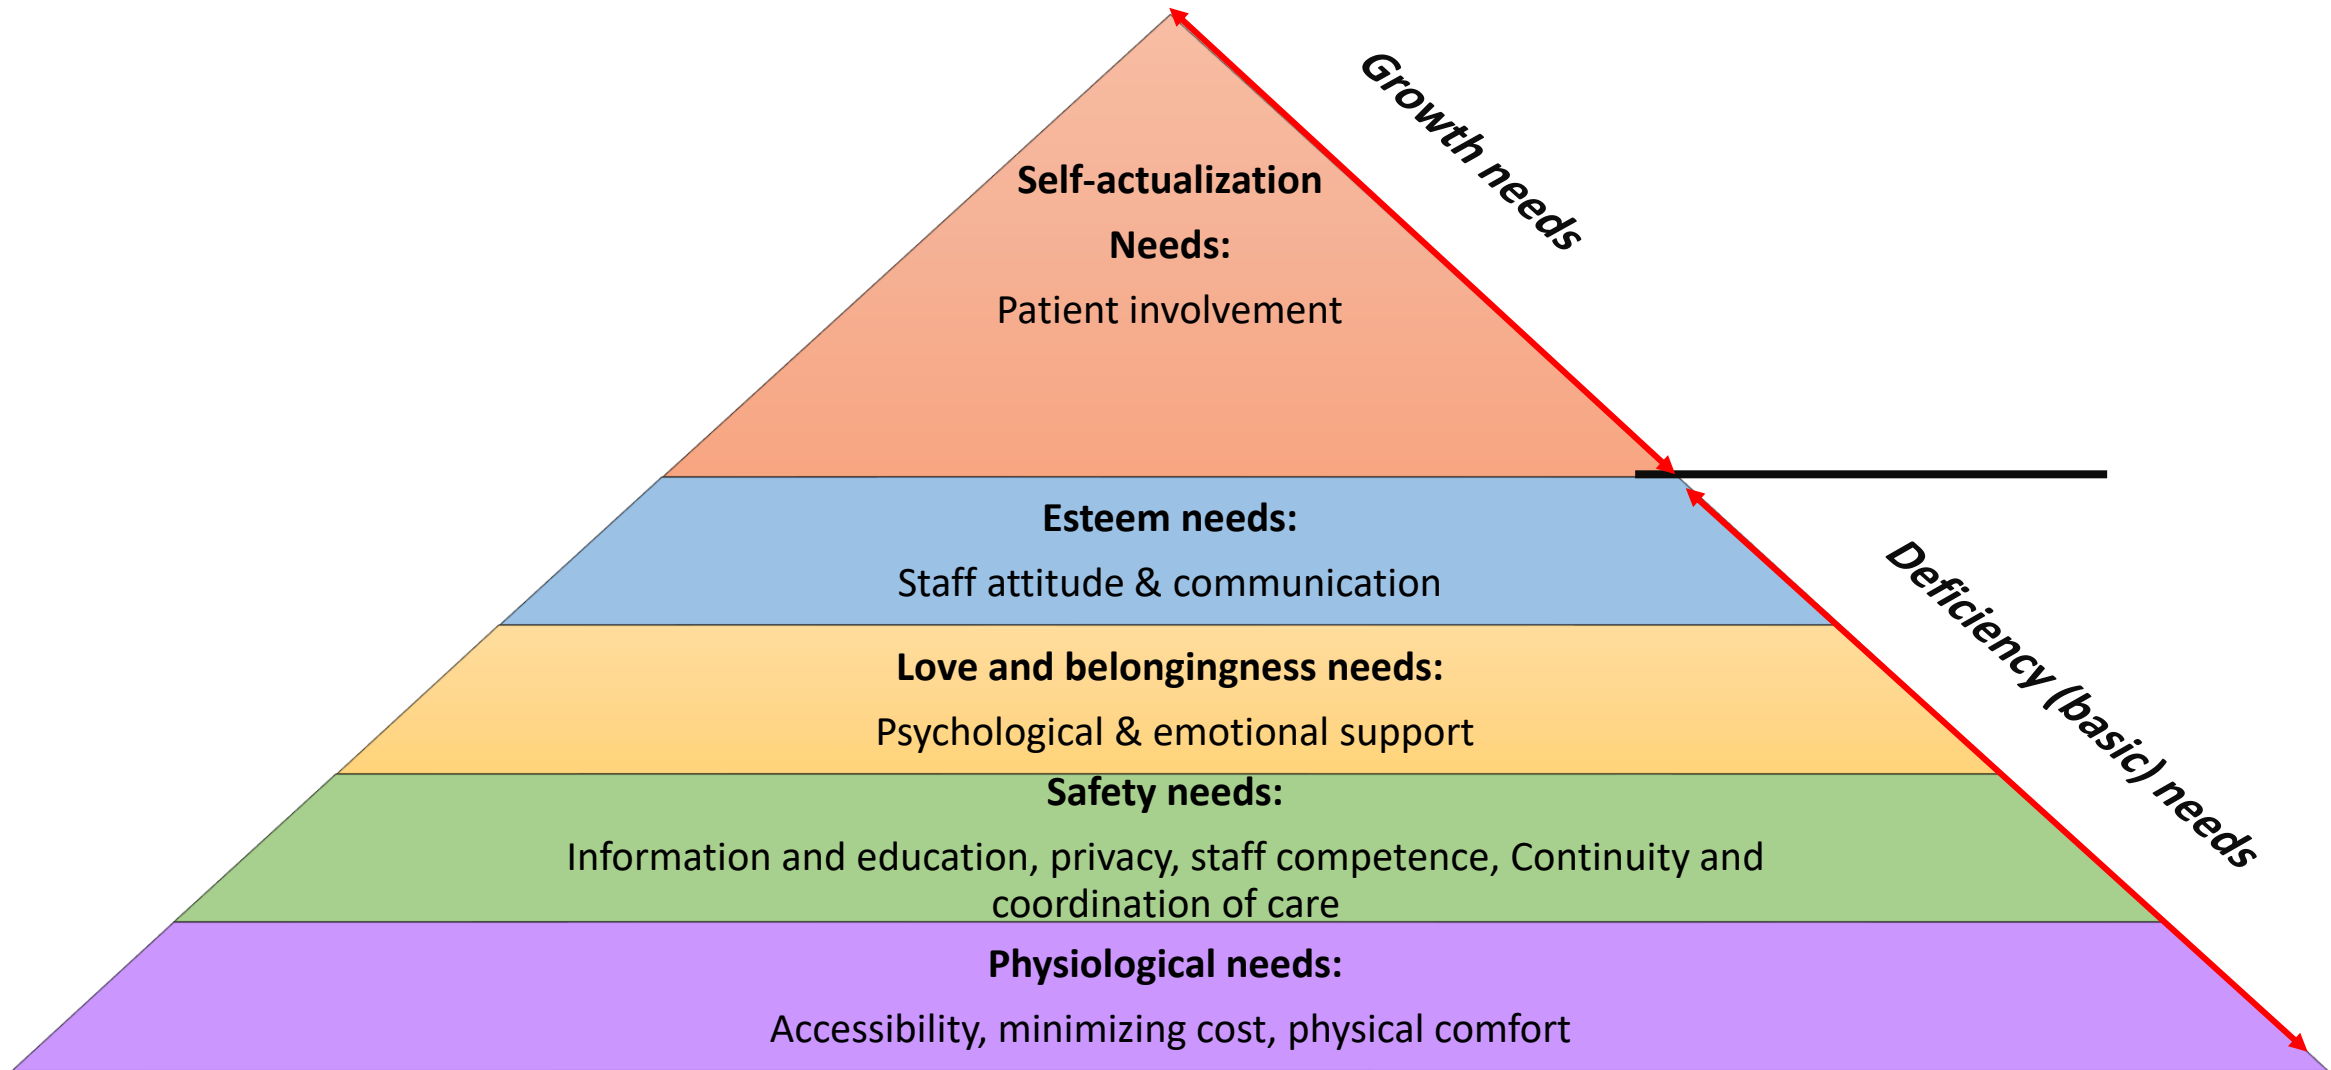

1

2  
3 **Title** Exploring patient-centered infertility care among Arab infertile women: a qualitative study  
4

5 **Journal name:** BMJ Open  
6

7 **Authors**  
8

9 Hana Hasan Webair<sup>1,2\*</sup>,

10 Tengku Alina Tengku Ismail<sup>3</sup>,

11 Shaiful Bahari Ismail<sup>1</sup>,

12 Azza Jameel Khaffaji<sup>4</sup>  
13

14  
15  
16  
17 <sup>1</sup>Department of Family Medicine, School of Medical Sciences, Universiti Sains Malaysia, Health  
18 Campus, 16150 Kubang Kerian, Kelantan, Malaysia

19  
20 <sup>2</sup>Department of Family Medicine, Hadhramout University, College of Medicine, PO Box 50512,  
21 Mukalla, Hadhramaut, Yemen

22  
23 <sup>3</sup>Department of Community Medicine, School of Medical Sciences, Universiti Sains Malaysia, Health  
24 Campus, 16150 Kubang Kerian, Kelantan, Malaysia

25  
26 <sup>4</sup>Obstetrics and Gynaecology Department, King Abdulaziz Hospital, Ministry of Health, P.O.Box  
27 31467 Jeddah 21497, Saudi Arabia

28  
29 \*Corresponding address: MSc, Department of Family Medicine, School of Medical Sciences,  
30 Universiti Sains Malaysia, Health Campus, 16150 Kubang Kerian, Kelantan, Malaysia. Email;  
31 hhwebair@gmail.com. Tel: +601126502099.  
32  
33  
34  
35  
36  
37  
38  
39  
40  
41  
42  
43  
44  
45  
46  
47  
48  
49  
50  
51  
52  
53  
54  
55  
56  
57  
58  
59  
60

**In-depth Interview Guide**

**Background Information**

|                                                                                                                                                                                                                                                                  |                                                                    |
|------------------------------------------------------------------------------------------------------------------------------------------------------------------------------------------------------------------------------------------------------------------|--------------------------------------------------------------------|
| ID:                                                                                                                                                                                                                                                              |                                                                    |
| Personal data                                                                                                                                                                                                                                                    |                                                                    |
| Age (years):                                                                                                                                                                                                                                                     | Sex: <input type="checkbox"/> Male <input type="checkbox"/> Female |
| Education: <input type="checkbox"/> Illiterate <input type="checkbox"/> Primary <input type="checkbox"/> Secondary<br><input type="checkbox"/> Diploma <input type="checkbox"/> Bachelor <input type="checkbox"/> Master or higher                               |                                                                    |
| Occupation                                                                                                                                                                                                                                                       | Address                                                            |
| Infertility-related data                                                                                                                                                                                                                                         |                                                                    |
| Duration of marriage (months):                                                                                                                                                                                                                                   | Duration of infertility (months):                                  |
| Duration of seeking fertility care (months):                                                                                                                                                                                                                     | No of pregnancies:                                                 |
| No. of live children:                                                                                                                                                                                                                                            | Cause of infertility:                                              |
| Are you (your wife) pregnant now? <input type="checkbox"/> Yes <input type="checkbox"/> No                                                                                                                                                                       |                                                                    |
| <p>Where you had received fertility care; please write the name of clinic and hospital. If you sought more than one clinic, please mention them chronologically and specify the period in front of each.</p> <p>.....</p> <p>.....</p> <p>.....</p> <p>.....</p> |                                                                    |



### In-depth Interview Guide (con'd)

|                                    |                                                                                                                                                                                                                                                                                                                                                                                                                                                                                                                                                                                                                                                                                                                                                                                                                                                                    |
|------------------------------------|--------------------------------------------------------------------------------------------------------------------------------------------------------------------------------------------------------------------------------------------------------------------------------------------------------------------------------------------------------------------------------------------------------------------------------------------------------------------------------------------------------------------------------------------------------------------------------------------------------------------------------------------------------------------------------------------------------------------------------------------------------------------------------------------------------------------------------------------------------------------|
| <p>Introduction Key Components</p> | <ul style="list-style-type: none"> <li>✓ Participant name and personal data</li> <li>✓ Research information</li> <li>✓ Signature of consent</li> </ul>                                                                                                                                                                                                                                                                                                                                                                                                                                                                                                                                                                                                                                                                                                             |
| <p>Questions</p>                   | <ol style="list-style-type: none"> <li>1. What types of infertility medical care have you received?</li> <li>2. What characteristics of infertility care, would you recommend be sustained and/or introduced? Please provide a justification for your response.</li> <li>3. What are the things you have missed in your infertility care?</li> <li>4. What do you think will work well in increasing utilization of infertility care? Please explain</li> <li>5. How would you recommend for future infertility care?</li> <li>6. If all what you have recommended above are made available, would you seek other non-medical source of care for infertility? Please justify</li> <li>7. What are the elements of patient-centered fertility care from your point of view? Please elaborate</li> </ol> <p><u>N.B.</u></p> <p>-Probes should be used as needed.</p> |
| <p>Closing Key Components</p>      | <ul style="list-style-type: none"> <li>✓ Is there anything more you would like to add?</li> <li>✓ I'll be analyzing the information you and others gave me. I'll be happy to send you a copy of the result, if you are interested.</li> <li>✓ Thank you for your time.</li> </ul>                                                                                                                                                                                                                                                                                                                                                                                                                                                                                                                                                                                  |

## دليل المقابلة المتعمقة

|                                                                                                                                                                                                                                                                                                                                                                                                                                                                                                                                                                                                                                                                                      |                                |
|--------------------------------------------------------------------------------------------------------------------------------------------------------------------------------------------------------------------------------------------------------------------------------------------------------------------------------------------------------------------------------------------------------------------------------------------------------------------------------------------------------------------------------------------------------------------------------------------------------------------------------------------------------------------------------------|--------------------------------|
| <p>✓ البيانات الشخصية</p> <p>✓ معلومات حول البحث</p> <p>✓ التوقيع على الموافقة</p>                                                                                                                                                                                                                                                                                                                                                                                                                                                                                                                                                                                                   | <p>مكونات المقدمة الرئيسية</p> |
| <p>١. ماهي أنواع الرعاية الطبية لتأخر الحمل التي خضعت لها من قبل؟</p> <p>٢. ماهي مواصفات الرعاية الصحية لتأخر الحمل التي توصين أن نبقى عليها أو نستحدثها؟ أرجو تبرير جابتك</p> <p>٣. ماهي الأشياء التي افتقدتها أثناء تلقيك الرعاية الطبية لتأخر الحمل؟</p> <p>٤. ماهي الأشياء التي تعتقدين أنها ستكون فعالة في زيادة الاستفادة من رعاية تأخر الحمل؟ أرجو الشرح</p> <p>٥. كيف تنصحين للرعاية الطبية لتأخر الحمل في المستقبل؟</p> <p>٦. إذا تم توفير كل ما أوصيت به أعلاه، هل ستلجئ لوسائل أخرى غير طبية لعلاج تأخر الحمل؟ أرجو التبرير</p> <p>٧. ماهي مكونات الرعاية المتمركزة حول المريض من وجهة نظرك؟ أرجو التفصيل</p> <p><u>ملاحظة:</u></p> <p>- ستستخدم التحقيقات حسب الحاجة</p> | <p>الأسئلة</p>                 |
| <p>✓ هل هناك أي شيء تودين إضافته؟</p> <p>✓ سأقوم بتحليل المعلومات التي أعطيتني أنت و غيرك من المشاركين. سأكون سعيدا لأرسل لك نسخة من النتيجة، إذا كانت تهتمك.</p> <p>✓ شكرا لك على وقتك</p>                                                                                                                                                                                                                                                                                                                                                                                                                                                                                          | <p>مكونات الخاتمة الرئيسية</p> |

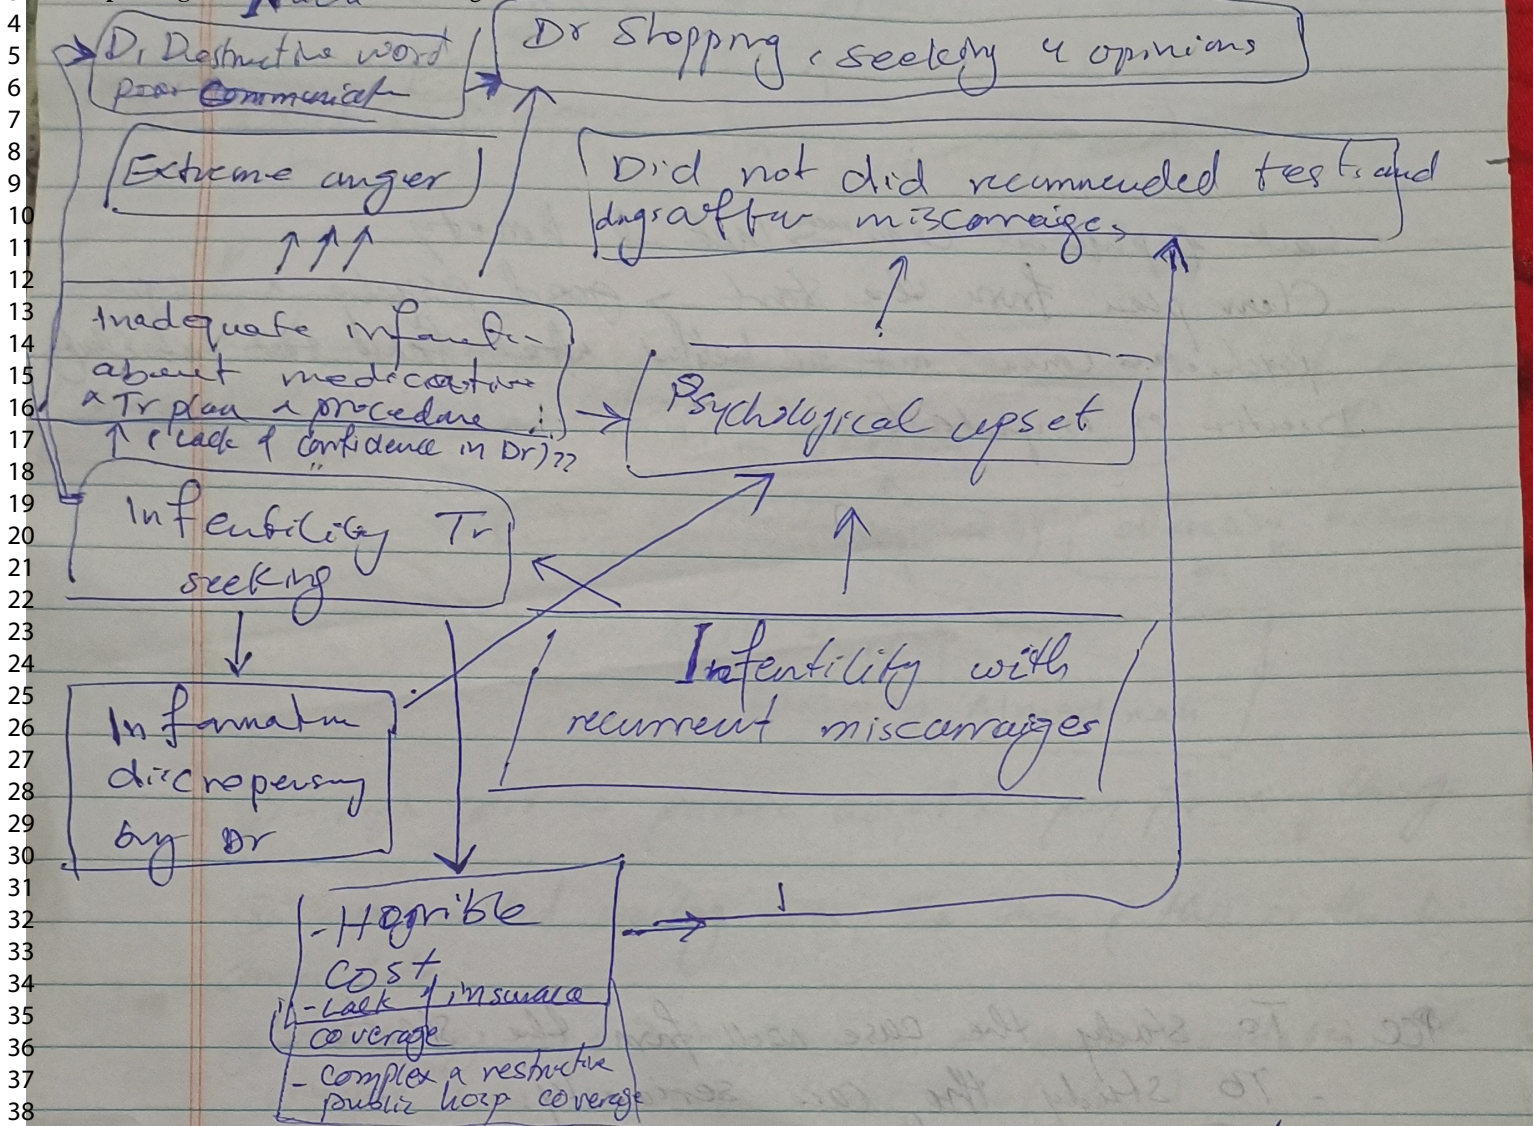

Input notes

- All are negative no many positive points
- Loss of confidence <sup>due to lack of information</sup> (Quotes: "It was possible to tell me we will keep you under observation...")
- Lack of clear plan from the start, lack of studying the case from all aspects from the start.
- Horrible price
- Appointments → No walk-in → Walk-in should be accepted
- Direct contact with Dr through personal mobile
- Online consultations esp. for big names Dr
- Insurance should cover at least part of the cost

(8)

- Lack of physical exam <sup>means</sup> → lack of honesty
- Clear plan from the start → good psyche & acceptance  
psychiatric consult may be helpful after failed bed tub study
- Dietician is important

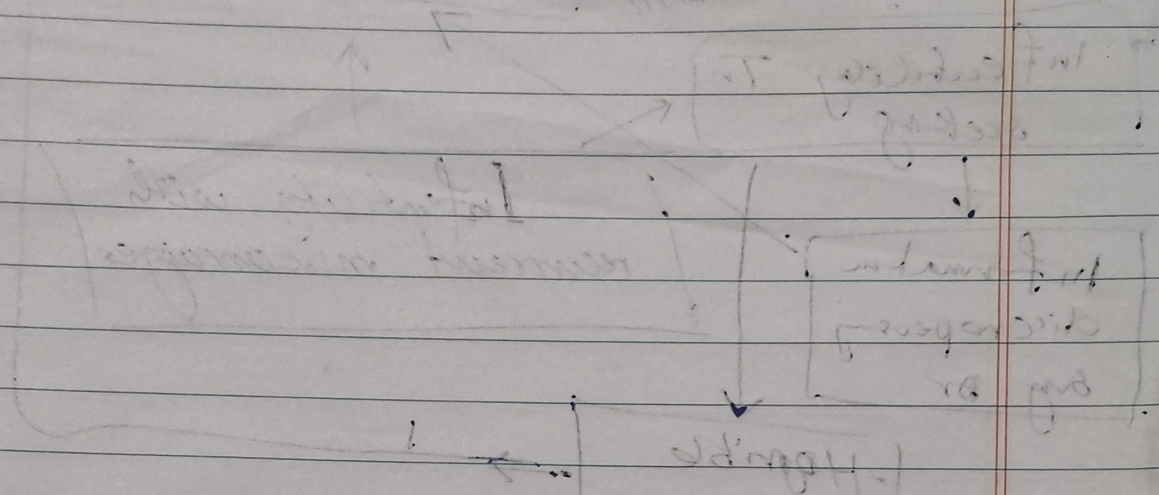

- PCC: To study the case well from the start.
- To study the case seriously.
  - To consider financial circumstances, to give it a high priority

9

1  
2  
3 **Title** Exploring patient-centered infertility care among Arab infertile women: a qualitative study  
4

5 **Journal name:** BMJ Open  
6

7 **Authors**  
8

9 Hana Hasan Webair<sup>1,2\*</sup>,

10  
11 Tengku Alina Tengku Ismail<sup>3</sup>,

12  
13 Shaiful Bahari Ismail<sup>1</sup>,

14  
15 Azza Jameel Khaffaji<sup>4</sup>  
16

17 <sup>1</sup>Department of Family Medicine, School of Medical Sciences, Universiti Sains Malaysia, Health  
18 Campus, 16150 Kubang Kerian, Kelantan, Malaysia  
19

20 <sup>2</sup>Department of Family Medicine, Hadhramout University, College of Medicine, PO Box 50512,  
21 Mukalla, Hadhramaut, Yemen  
22

23 <sup>3</sup>Department of Community Medicine, School of Medical Sciences, Universiti Sains Malaysia, Health  
24 Campus, 16150 Kubang Kerian, Kelantan, Malaysia  
25

26 <sup>4</sup>Obstetrics and Gynaecology Department, King Abdulaziz Hospital, Ministry of Health, P.O.Box  
27 31467 Jeddah 21497, Saudi Arabia  
28

29 \*Corresponding address: MSc, Department of Family Medicine, School of Medical Sciences,  
30 Universiti Sains Malaysia, Health Campus, 16150 Kubang Kerian, Kelantan, Malaysia. Email;  
31 hhwebair@gmail.com. Tel: +601126502099.  
32  
33  
34  
35  
36  
37  
38  
39  
40  
41  
42  
43  
44  
45  
46  
47  
48  
49  
50  
51  
52  
53  
54  
55  
56  
57  
58  
59  
60

**Panel: Quotations showing participants' definitions of patient-centred infertility care (PCIC) and dominant events in each patient's experience**

|                                                                                                                                                                                                                                                                                                                                                                                                                                                                                                                                                                                                                                                                                                                                                                                                                                                                           |                                                                                                                                                                                                                                                                                                                                                                                                                                                                                                                                                                                                                                                                                                                                                                                                                                                                                                                                                                           |
|---------------------------------------------------------------------------------------------------------------------------------------------------------------------------------------------------------------------------------------------------------------------------------------------------------------------------------------------------------------------------------------------------------------------------------------------------------------------------------------------------------------------------------------------------------------------------------------------------------------------------------------------------------------------------------------------------------------------------------------------------------------------------------------------------------------------------------------------------------------------------|---------------------------------------------------------------------------------------------------------------------------------------------------------------------------------------------------------------------------------------------------------------------------------------------------------------------------------------------------------------------------------------------------------------------------------------------------------------------------------------------------------------------------------------------------------------------------------------------------------------------------------------------------------------------------------------------------------------------------------------------------------------------------------------------------------------------------------------------------------------------------------------------------------------------------------------------------------------------------|
| <p><i>'we lacked health awareness. I may enter to do dental x-ray; they do not tell me you should cover your body with a special cover. So, if you don't know, you will not find guidance. Information and awareness raising are first. Awareness raising and stop putting everything on the woman'.</i></p> <p><b>Participant 1: 30- 35 years age group, primary infertility, bachelor's degree, male factor</b></p> <p>Doctors treated her as the cause for infertility and did not investigate her husband. As a result, she was exposed to unnecessary treatment for nine months, with no benefit. Finally, they performed a semen analysis and diagnosed male-factor infertility. The option of IVF was not discussed with her, and the doctor instead prescribed medication. She searched for a second opinion and knew the best option for their case was IVF.</p> | <p><i>'Regarding infertility treatment, case study...means to study all aspects...Regarding diet, psychological comfort, the patient who does something which causes the problem...I mean, I should revise the patient's case, the routines in her life. There are fixed essentials in a patient's life that could be wrong and could be the cause behind her problem'.</i></p> <p><b>Participant 2: 35-39 years age group, secondary infertility, 3 daughters, bachelor degree, endometriosis.</b></p> <p>She had three daughters from her first marriage spontaneously. After her second marriage, she developed endometriosis, with recurrent cysts and adhesions, which caused pain and infertility. She was very upset by this new issue in her life, and how the modern medicine did not find the cause behind it. She lived in a city away from Jeddah, with an unsupportive husband who gave up on operations and follow-up. She had very poor mental health.</p> |
| <p><i>'I feel it should be the same as when I delivered for the second time. The doctor welcomed me warmly! She asked me what type of delivery I'd prefer to have—this should be your choice. I told her I wanted to deliver normally. She told me, I will give you a paper to sign, and I will do my best to deliver you normally. If there is even one percent risk for you or the baby, excuse me, I will shift you to caesarean. I mean, she explained everything for you! When she came to do anything, she explained it for me—I will do so and so for this purpose. Although I did not understand their language—it was in America—everything was by sign language. I mean, there was a big</i></p>                                                                                                                                                                | <p><i>'It is clear from the words that it means when the doctor becomes interested in his patient, what the patient likes and prefers. As I mentioned, to treat the patient as a human, the way he is comfortable, without forcing him. To give him his due. For example, if there are two medicines with the same effect, I should prescribe what the patient is comfortable using. To deal with the patient in a humanitarian, not materialistic way. For example, when I gave birth to my daughter, I wanted to give the doctor who delivered her a gift, because she supported and helped me. People says it is her duty! But the doctor who knows his job makes people feel comfortable'.</i></p>                                                                                                                                                                                                                                                                    |

|                                                                                                                                                                                                                                                                                                                                                                                                                                                                                                                                                                                                                                                                                                                                                                                         |                                                                                                                                                                                                                                                                                                                                                                                                                                                                                                                                                                                                                                                                                                                                                                                                                      |
|-----------------------------------------------------------------------------------------------------------------------------------------------------------------------------------------------------------------------------------------------------------------------------------------------------------------------------------------------------------------------------------------------------------------------------------------------------------------------------------------------------------------------------------------------------------------------------------------------------------------------------------------------------------------------------------------------------------------------------------------------------------------------------------------|----------------------------------------------------------------------------------------------------------------------------------------------------------------------------------------------------------------------------------------------------------------------------------------------------------------------------------------------------------------------------------------------------------------------------------------------------------------------------------------------------------------------------------------------------------------------------------------------------------------------------------------------------------------------------------------------------------------------------------------------------------------------------------------------------------------------|
| <p><i>difference in her attitude, from my first delivery. This is patient-centred care’.</i></p> <p><b>Participant 3: 25- 39 years age group, secondary infertility, 2 sons, bachelor’s degree, ovulatory cause</b></p> <p>Complained of inadequate information, especially regarding medication, and the absence of collaboration in management planning. She needed to ask her physician about medication, but could not reach her, due to having no method for communication. She looked for a second opinion (her friend was a doctor), who gave her a plan that was different from her doctor’s plan. She was confused and unsatisfied.</p>                                                                                                                                        | <p><b>Participant 4: 35- 39 years age group, secondary infertility, son &amp; daughter, high school diploma, hyperprolactinemia</b></p> <p>She did not like medication or hospital work-ups, and preferred natural remedies. She started complementary medicine, and when it failed, she sought medical care. She had irregular visits, then she stopped seeking care due to lack of appropriate appointments, very expensive treatment, and lack of support from her husband. Her husband blamed her for the infertility, although both of them had children from their first marriages, and refused semen analysis, so her doctor refused to treat her. One doctor told her she was the cause of the infertility, and another one told her after all that, you want to get pregnant (2 kids and 34 years old)!</p> |
| <p><i>‘If we make treatments personalised, if we talk about the patients themselves... my doctor was treating me, and told me, “you are overweight, so you should drink a lot of water”, talking about me personally’.</i></p> <p><b>Participant 5: 25- 29 years age group, primary infertility, bachelor’s degree, ovulatory cause</b></p> <p>She thought obesity was the cause of her infertility. She tried treating this in a public hospital, but discontinued because they dealt with her disease-wise, not as a person. She started obesity treatment on her own, for herself and her husband. She went to a doctor in a public hospital, despite the very poor environment and services, and the presence of trainees, only because that doctor personalised her treatment.</p> | <p><i>‘The doctors and the nurses themselves should be good. Also, the place, the hospital itself, prepares you. The cleanliness of the hospital...The devices should be advanced enough, some hospitals are really....that’s all’.</i></p> <p><b>Participant 6: 20-24 years age group, primary infertility, secondary school, unexplained infertility</b></p> <p>She had a bad experience with materialistic doctors and no health benefits. She also had bad experiences with public hospitals that lacked facilities and were a poor environment. She shifted to a private hospital, although it was expensive. The cause of her infertility remained unknown until finally, she visited a doctor who recommended a scope for the first time. She was sad nobody told her about it before!</p>                    |

|                                                                                                                                                                                                                                                                                                                                                                                                                                                                                                                                                                                                                                                                                                                                                                                                                                                                                                                                                                                                                                                  |                                                                                                                                                                                                                                                                                                                                                                                                                                                                                                                                                                                                                                                                                                                                                                                                                                                                                                                                                                                                                                                                                                                                                                                                               |
|--------------------------------------------------------------------------------------------------------------------------------------------------------------------------------------------------------------------------------------------------------------------------------------------------------------------------------------------------------------------------------------------------------------------------------------------------------------------------------------------------------------------------------------------------------------------------------------------------------------------------------------------------------------------------------------------------------------------------------------------------------------------------------------------------------------------------------------------------------------------------------------------------------------------------------------------------------------------------------------------------------------------------------------------------|---------------------------------------------------------------------------------------------------------------------------------------------------------------------------------------------------------------------------------------------------------------------------------------------------------------------------------------------------------------------------------------------------------------------------------------------------------------------------------------------------------------------------------------------------------------------------------------------------------------------------------------------------------------------------------------------------------------------------------------------------------------------------------------------------------------------------------------------------------------------------------------------------------------------------------------------------------------------------------------------------------------------------------------------------------------------------------------------------------------------------------------------------------------------------------------------------------------|
| <p>1<br/>2<br/>3<br/>4<br/>5<br/>6<br/>7<br/>8<br/>9<br/>10<br/>11<br/>12<br/>13<br/>14<br/>15<br/>16<br/>17<br/>18<br/>19<br/>20<br/>21<br/>22<br/>23<br/>24<br/>25<br/>26<br/>27<br/>28<br/>29<br/>30<br/>31</p> <p><i>'The first thing is to take care of patients and treat them. Treatment, for example. I mean, to care about treatment and medications, what is the patient's problem—from what? Yes, they should know what the patient's problem is and treat it'.</i></p> <p><b>Participant 7: 40-45 years age group, secondary infertility, no living children, secondary school, male factor</b></p> <p>The cause was unknown, apart from her age. Then, her husband developed male factor infertility after one failed IVF. She followed up in both public and private hospitals. She used traditional medicine when doctors did not diagnose the cause of her infertility.</p>                                                                                                                                                      | <p>1<br/>2<br/>3<br/>4<br/>5<br/>6<br/>7<br/>8<br/>9<br/>10<br/>11<br/>12<br/>13<br/>14<br/>15<br/>16<br/>17<br/>18<br/>19<br/>20<br/>21<br/>22<br/>23<br/>24<br/>25<br/>26<br/>27<br/>28<br/>29<br/>30<br/>31</p> <p><i>'To study the case well from the start. To study the case seriously! Not only try, try haphazardly, and that's it. No! To study the case seriously! To consider the financial circumstances. To give it high priority, not only, "this what we have, do it"'</i>.</p> <p><b>Participant 8: 40-45 years age group, secondary infertility, 2 living children, bachelor's degree, unexplained infertility</b></p> <p>She had recurrent miscarriages after two births. Now, she is over 40. She received conflicting opinions from different doctors. Finally, after six miscarriages and getting older, she knew the best option in her case was to test the abortus for genetic disorders. However, because it was not done, she could try IVF with genetic testing for the embryos. She knew it would cost around 30,000 SR, which is out of her ability. So, she does not trust doctors and would habitually seek four different doctors' opinion before starting any treatment.</p> |
| <p>32<br/>33<br/>34<br/>35<br/>36<br/>37<br/>38<br/>39<br/>40<br/>41<br/>42<br/>43<br/>44<br/>45<br/>46<br/>47<br/>48<br/>49<br/>50<br/>51<br/>52<br/>53<br/>54<br/>55<br/>56<br/>57<br/>58<br/>59<br/>60</p> <p><i>'Do you mean all of this could be centred on me? So, the patient should have interests, have awareness, have... right? Aha! to.. of course, you cannot control that, why? Because there will be overload, so doctors will not be able to cover it all. So, whatever I tell you, it will not be covered fully; therefore, whatever you do for me I will not see anything! Aha! It depends on the patient and complaint, you know? Apart from that, the most important thing is psychological preparation'.</i></p> <p><b>Participant 9: 35-39 years age group, secondary infertility, 2 daughters, bachelor's degree (medical staff), undiagnosed infertility (husband refused semen analysis)</b></p> <p>Her husband is very unsupportive and destructive. She has had poor experiences with the female doctors and good</p> | <p>32<br/>33<br/>34<br/>35<br/>36<br/>37<br/>38<br/>39<br/>40<br/>41<br/>42<br/>43<br/>44<br/>45<br/>46<br/>47<br/>48<br/>49<br/>50<br/>51<br/>52<br/>53<br/>54<br/>55<br/>56<br/>57<br/>58<br/>59<br/>60</p> <p><i>'The term means to make appointments booking easily available and to listen to me. Yes! And to listen to me, I mean to hear me well, and my interests, and so on. I mean the same thing—the discrimination. To avoid discrimination when dealing with patients'.</i></p> <p><b>Participant 10: 30-35 years age group, secondary infertility, daughter &amp; son, literate, ovulatory cause</b></p> <p>She had secondary infertility after her first daughter, and was on ovulation induction for a long time. First, she went to doctors for that purpose. Then, because it is difficult to find appointment soon, and this caused missing the chance for following ovulation and intercourse timing, thereby delaying treatment, she started taking medication illegally and following ovulation in any polyclinic nearby. She had a lot of questions and was in a hurry to get pregnant, as she had marital instability and her social norms meant</p>                                  |



|                                                                                                                                                                                                                                                                                                                                                                                                                                                                                                                                                                                                                                                                                                                                                                                                   |                                                                                                                                                                                                                                                                                                                                                                                                                                                                                                                                                                                                                                                                                                                                                                                                                                                                                                    |
|---------------------------------------------------------------------------------------------------------------------------------------------------------------------------------------------------------------------------------------------------------------------------------------------------------------------------------------------------------------------------------------------------------------------------------------------------------------------------------------------------------------------------------------------------------------------------------------------------------------------------------------------------------------------------------------------------------------------------------------------------------------------------------------------------|----------------------------------------------------------------------------------------------------------------------------------------------------------------------------------------------------------------------------------------------------------------------------------------------------------------------------------------------------------------------------------------------------------------------------------------------------------------------------------------------------------------------------------------------------------------------------------------------------------------------------------------------------------------------------------------------------------------------------------------------------------------------------------------------------------------------------------------------------------------------------------------------------|
| <p>experiences with male ones, regarding communication skills. She felt men are easier to understand.</p>                                                                                                                                                                                                                                                                                                                                                                                                                                                                                                                                                                                                                                                                                         | <p>she should have many children. Doctors gave up answering her questions. She had ovarian cysts and two operations.</p>                                                                                                                                                                                                                                                                                                                                                                                                                                                                                                                                                                                                                                                                                                                                                                           |
| <p><i>'The most important thing is the behaviour of the doctor, also the receptionist, and the hospital as a whole. The nurses and all should serve the patient. I mean, some of them, their behaviour is as if you are coming to panhandle. As if they are not employed and receiving salaries! They should serve us and others. This is their job'.</i></p> <p><b>Participant 11: 30-35 years age group, primary infertility, bachelor's degree, tubal factor?</b></p> <p>She lived far away, but chose to come to Jeddah, because her friend had a positive experience. She started in government hospitals, then after long wait times and offensive behaviour from one doctor, she shifted to a private hospital, although it was very expensive.</p>                                        | <p><i>'First should be to pay attention to the patient's psychological status. To pay attention to the patient's feelings. I mean, do not destroy patients. For example, if there is no effective treatment! Or if the sperm is of no value! This sometimes destroys the patient'.</i></p> <p><b>Participant 12: 25-29 years age group, primary infertility, high school diploma, male factor</b></p> <p>She had failed intrauterine insemination and IVF attempts. She discovered afterwards that her doctor did not disclose to them the male factor or low success rate. She planned to change to another doctor, but could not pay the cost. She contacted an unlicensed therapist through Instagram who claimed he had medicines for sperms count and quality. She was so happy with his way of communication and that he listened to her whole history that wanted to continue with him.</p> |
| <p><i>'I hope there is something like this. It is awesome! To not be purely materialistic. Actually, the cost should not be huge. The situation should not be purely materialistic. I mean, I have to pay for anything to be done for me! For example, for the psychologist, I need to pay a large sum of money! For each visit he sets with me, I will pay?! No'.</i></p> <p><b>Participant 13: 40-45 years age group, primary infertility, secondary school, tubal factor</b></p> <p>She started medical treatment, but it failed. It was found that her fallopian tubes were blocked. IVF was recommended, with some procedures beforehand. She could not do it, due to cost. She complained of social pressure and blame. She did not understand doctors well because they spoke English.</p> | <p><i>'The care, by all means, is patient-centred. There is a discussion between the doctor and patient. The doctor provides what he has, if the patient does not like something, the patient should say so. Yes. So, it depends on the patient. If the patient discusses matters with the doctor, they will find an answer. But if the doctor spontaneously asks the patient what do you want? No! Here, I will be in doubt—is this really a doctor?'</i></p> <p><b>Participant 14: 25-29 years age group, 1ry infertility, bachelor's degree, ovulatory cause</b></p> <p>She had an ovarian cyst with pain and dyspareunia. She started with a doctor who treated her with medications that showed no benefits. She then changed to another doctor, who removed the cyst surgically. She went to a third doctor for infertility, who gave her a clear plan from the start (still ongoing).</p>   |

1  
2  
3  
4  
5  
6  
7  
8  
9  
10  
11  
12  
13  
14  
15  
16  
17  
18  
19  
20  
21  
22  
23  
24  
25  
26  
27  
28  
29  
30  
31  
32  
33  
34  
35  
36  
37  
38  
39  
40  
41  
42  
43  
44  
45  
46  
47  
48  
49  
50  
51  
52  
53  
54  
55  
56  
57  
58  
59  
60

For peer review only

## COREQ (CONsolidated criteria for REporting Qualitative research) Checklist

A checklist of items that should be included in reports of qualitative research. You must report the page number in your manuscript where you consider each of the items listed in this checklist. If you have not included this information, either revise your manuscript accordingly before submitting or note N/A.

| Topic                                          | Item No. | Guide Questions/Description                                                                                                                              | Reported on Page No. |
|------------------------------------------------|----------|----------------------------------------------------------------------------------------------------------------------------------------------------------|----------------------|
| <b>Domain 1: Research team and reflexivity</b> |          |                                                                                                                                                          |                      |
| <i>Personal characteristics</i>                |          |                                                                                                                                                          |                      |
| Interviewer/facilitator                        | 1        | Which author/s conducted the interview or focus group?                                                                                                   |                      |
| Credentials                                    | 2        | What were the researcher's credentials? E.g. PhD, MD                                                                                                     |                      |
| Occupation                                     | 3        | What was their occupation at the time of the study?                                                                                                      |                      |
| Gender                                         | 4        | Was the researcher male or female?                                                                                                                       |                      |
| Experience and training                        | 5        | What experience or training did the researcher have?                                                                                                     |                      |
| <i>Relationship with participants</i>          |          |                                                                                                                                                          |                      |
| Relationship established                       | 6        | Was a relationship established prior to study commencement?                                                                                              |                      |
| Participant knowledge of the interviewer       | 7        | What did the participants know about the researcher? e.g. personal goals, reasons for doing the research                                                 |                      |
| Interviewer characteristics                    | 8        | What characteristics were reported about the interviewer/facilitator? e.g. Bias, assumptions, reasons and interests in the research topic                |                      |
| <b>Domain 2: Study design</b>                  |          |                                                                                                                                                          |                      |
| <i>Theoretical framework</i>                   |          |                                                                                                                                                          |                      |
| Methodological orientation and Theory          | 9        | What methodological orientation was stated to underpin the study? e.g. grounded theory, discourse analysis, ethnography, phenomenology, content analysis |                      |
| <i>Participant selection</i>                   |          |                                                                                                                                                          |                      |
| Sampling                                       | 10       | How were participants selected? e.g. purposive, convenience, consecutive, snowball                                                                       |                      |
| Method of approach                             | 11       | How were participants approached? e.g. face-to-face, telephone, mail, email                                                                              |                      |
| Sample size                                    | 12       | How many participants were in the study?                                                                                                                 |                      |
| Non-participation                              | 13       | How many people refused to participate or dropped out? Reasons?                                                                                          |                      |
| <i>Setting</i>                                 |          |                                                                                                                                                          |                      |
| Setting of data collection                     | 14       | Where was the data collected? e.g. home, clinic, workplace                                                                                               |                      |
| Presence of non-participants                   | 15       | Was anyone else present besides the participants and researchers?                                                                                        |                      |
| Description of sample                          | 16       | What are the important characteristics of the sample? e.g. demographic data, date                                                                        |                      |
| <i>Data collection</i>                         |          |                                                                                                                                                          |                      |
| Interview guide                                | 17       | Were questions, prompts, guides provided by the authors? Was it pilot tested?                                                                            |                      |
| Repeat interviews                              | 18       | Were repeat interviews carried out? If yes, how many?                                                                                                    |                      |
| Audio/visual recording                         | 19       | Did the research use audio or visual recording to collect the data?                                                                                      |                      |
| Field notes                                    | 20       | Were field notes made during and/or after the interview or focus group?                                                                                  |                      |
| Duration                                       | 21       | What was the duration of the interviews or focus group?                                                                                                  |                      |
| Data saturation                                | 22       | Was data saturation discussed?                                                                                                                           |                      |
| Transcripts returned                           | 23       | Were transcripts returned to participants for comment and/or                                                                                             |                      |

| Topic                                  | Item No. | Guide Questions/Description                                                                                                        | Reported on Page No. |
|----------------------------------------|----------|------------------------------------------------------------------------------------------------------------------------------------|----------------------|
|                                        |          | correction?                                                                                                                        |                      |
| <b>Domain 3: analysis and findings</b> |          |                                                                                                                                    |                      |
| <i>Data analysis</i>                   |          |                                                                                                                                    |                      |
| Number of data coders                  | 24       | How many data coders coded the data?                                                                                               |                      |
| Description of the coding tree         | 25       | Did authors provide a description of the coding tree?                                                                              |                      |
| Derivation of themes                   | 26       | Were themes identified in advance or derived from the data?                                                                        |                      |
| Software                               | 27       | What software, if applicable, was used to manage the data?                                                                         |                      |
| Participant checking                   | 28       | Did participants provide feedback on the findings?                                                                                 |                      |
| <i>Reporting</i>                       |          |                                                                                                                                    |                      |
| Quotations presented                   | 29       | Were participant quotations presented to illustrate the themes/findings?<br>Was each quotation identified? e.g. participant number |                      |
| Data and findings consistent           | 30       | Was there consistency between the data presented and the findings?                                                                 |                      |
| Clarity of major themes                | 31       | Were major themes clearly presented in the findings?                                                                               |                      |
| Clarity of minor themes                | 32       | Is there a description of diverse cases or discussion of minor themes?                                                             |                      |

Developed from: Tong A, Sainsbury P, Craig J. Consolidated criteria for reporting qualitative research (COREQ): a 32-item checklist for interviews and focus groups. *International Journal for Quality in Health Care*. 2007. Volume 19, Number 6: pp. 349 – 357

**Once you have completed this checklist, please save a copy and upload it as part of your submission. DO NOT include this checklist as part of the main manuscript document. It must be uploaded as a separate file.**

Manuscript Title Exploring patient-centered infertility care among Arab infertile women: a qualitative study

Journal: BMJ Open

Authors:

Hana Hasan Webair<sup>1,2\*</sup>,  
Tengku Alina Tengku Ismail<sup>3</sup>,  
Shaiful Bahari Ismail<sup>1</sup>,  
Azza Jameel Khaffaji<sup>4</sup>

<sup>1</sup>Department of Family Medicine, School of Medical Sciences, Universiti Sains Malaysia, Health Campus, 16150 Kubang Kerian, Kelantan, Malaysia

<sup>2</sup>Department of Family Medicine, Hadhramout University, College of Medicine, PO Box 50512, Mukalla, Hadhramaut, Yemen

<sup>3</sup>Department of Community Medicine, School of Medical Sciences, Universiti Sains Malaysia, Health Campus, 16150 Kubang Kerian, Kelantan, Malaysia

<sup>4</sup>Obstetrics and Gynaecology Department, King Abdulaziz Hospital, Ministry of Health, P.O.Box 31467 Jeddah 21497, Saudi Arabia

\*Corresponding address: MSc, Department of Family Medicine, School of Medical Sciences, Universiti Sains Malaysia, Health Campus, 16150 Kubang Kerian, Kelantan, Malaysia. Email; hhwebair@gmail.com. Tel: +601126502099.

# BMJ Open

## Patient-centred infertility care among Arab women experiencing infertility: a qualitative study

|                                 |                                                                                                                                                                                                                                                                                                                                                                                                                                            |
|---------------------------------|--------------------------------------------------------------------------------------------------------------------------------------------------------------------------------------------------------------------------------------------------------------------------------------------------------------------------------------------------------------------------------------------------------------------------------------------|
| Journal:                        | <i>BMJ Open</i>                                                                                                                                                                                                                                                                                                                                                                                                                            |
| Manuscript ID                   | bmjopen-2020-044300.R1                                                                                                                                                                                                                                                                                                                                                                                                                     |
| Article Type:                   | Original research                                                                                                                                                                                                                                                                                                                                                                                                                          |
| Date Submitted by the Author:   | 15-Apr-2021                                                                                                                                                                                                                                                                                                                                                                                                                                |
| Complete List of Authors:       | Webair, Hana; Universiti Sains Malaysia - Kampus Kesihatan, Family Medicine; Hadhramout University College of Medicine and Health Sciences, Family Medicine<br>Ismail, Tengku Alina ; Universiti Sains Malaysia - Kampus Kesihatan, Community Medicine<br>Shaiful Bahari, Ismail ; Universiti Sains Malaysia - Kampus Kesihatan, Family Medicine<br>Khaffaji, Azza ; King Abdulaziz Hospital and Oncology Center, Obstetrics & Gynaecology |
| <b>Primary Subject Heading</b>: | Patient-centred medicine                                                                                                                                                                                                                                                                                                                                                                                                                   |
| Secondary Subject Heading:      | Health services research, Qualitative research, Reproductive medicine                                                                                                                                                                                                                                                                                                                                                                      |
| Keywords:                       | QUALITATIVE RESEARCH, Quality in health care < HEALTH SERVICES ADMINISTRATION & MANAGEMENT, Reproductive medicine < GYNAECOLOGY                                                                                                                                                                                                                                                                                                            |
|                                 |                                                                                                                                                                                                                                                                                                                                                                                                                                            |

SCHOLARONE™  
Manuscripts



I, the Submitting Author has the right to grant and does grant on behalf of all authors of the Work (as defined in the below author licence), an exclusive licence and/or a non-exclusive licence for contributions from authors who are: i) UK Crown employees; ii) where BMJ has agreed a CC-BY licence shall apply, and/or iii) in accordance with the terms applicable for US Federal Government officers or employees acting as part of their official duties; on a worldwide, perpetual, irrevocable, royalty-free basis to BMJ Publishing Group Ltd ("BMJ") its licensees and where the relevant Journal is co-owned by BMJ to the co-owners of the Journal, to publish the Work in this journal and any other BMJ products and to exploit all rights, as set out in our [licence](#).

The Submitting Author accepts and understands that any supply made under these terms is made by BMJ to the Submitting Author unless you are acting as an employee on behalf of your employer or a postgraduate student of an affiliated institution which is paying any applicable article publishing charge ("APC") for Open Access articles. Where the Submitting Author wishes to make the Work available on an Open Access basis (and intends to pay the relevant APC), the terms of reuse of such Open Access shall be governed by a Creative Commons licence – details of these licences and which [Creative Commons](#) licence will apply to this Work are set out in our licence referred to above.

Other than as permitted in any relevant BMJ Author's Self Archiving Policies, I confirm this Work has not been accepted for publication elsewhere, is not being considered for publication elsewhere and does not duplicate material already published. I confirm all authors consent to publication of this Work and authorise the granting of this licence.

1 **TITLE** Patient-centred infertility care among Arab women experiencing infertility: a qualitative study

2

3 Hana Hasan Webair<sup>1,2\*</sup>,

4 Tengku Alina Tengku Ismail<sup>3</sup>,

5 Shaiful Bahari Ismail<sup>1</sup>,

6 Azza Jameel Khaffaji<sup>4</sup>

7 <sup>1</sup>Department of Family Medicine, School of Medical Sciences, Universiti Sains Malaysia, Health

8 Campus, 16150 Kubang Kerian, Kelantan, Malaysia

9 <sup>2</sup>Department of Family Medicine, Hadhramout University, College of Medicine, PO Box 50512,

10 Mukalla, Hadhramaut, Yemen

11 <sup>3</sup>Department of Community Medicine, School of Medical Sciences, Universiti Sains Malaysia, Health

12 Campus, 16150 Kubang Kerian, Kelantan, Malaysia

13 <sup>4</sup>Obstetrics and Gynaecology Department, King Abdulaziz Hospital, Ministry of Health, P.O.Box

14 31467 Jeddah 21497, Saudi Arabia

15 \*Corresponding author address: MSc Department of Family Medicine, School of Medical Sciences,

16 Universiti Sains Malaysia, Health Campus, 16150 Kubang Kerian, Kelantan, Malaysia.

17 Email; hhwebair@gmail.com. Tel: +601126502099.

18 Word count: 3253

19

20

21

1  
2  
3 22 **ABSTRACT**  
4  
5

6 23 **Objective:** The current study aims to define patient-centred infertility care (PCIC) from the perspective  
7 24 of Arab women with infertility.

8  
9 25 **Design:** Semi-structured in-depth telephone interviews.

10  
11 26 **Setting:** Hospitals providing infertility care, Jeddah, Saudi Arabia.

12  
13 27 **Participants:** Arab women who received infertility treatment during the six months preceding the  
14 28 interview at any hospital in Jeddah, Saudi Arabia. Interviews were conducted with Arab women  
15 29 experiencing infertility from January 2017 to December 2018. A purposive sample of 14 women were  
16 30 included in the final analysis with maximum variation.

17  
18 31 **Results:** Participants highlighted nine important PCIC dimensions. Of these, four were agreed upon by  
19 32 all participants: accessibility, minimising cost, information and education, and staff attitudes and  
20 33 communication. The remaining five dimensions were staff competence, physical comfort, privacy,  
21 34 psychological and emotional support, and continuity and coordination of care. The concept of PCIC  
22 35 was related to three major contributors: participants' demographics, patient experience with infertility  
23 36 care, and health seeking behaviour (HSB).

24  
25 37 **Conclusions:** The current study provided nine PCIC dimensions and items, which can guide efforts to  
26 38 improve the quality of infertility care in Arab countries in two ways: first, by raising infertility care  
27 39 providers' awareness of their patients' needs, and second, by developing a validated tool based on the  
28 40 dimensions for measuring PCIC from Arab patients' perspective. Clear differences between the Arab  
29 41 and the European PCIC model were found. Our findings concluded that women continued to exhibit  
30 42 basic unmet needs.

31  
32  
33 43 **Keywords:** Patient-centred care, infertility, women's health services, Arab world  
34  
35  
36 44

37 45 **ARTICLE SUMMARY**  
38  
39

40 46 **Strengths and limitations of this study**  
41  
42

- 43 47 • This study defined for the first time the concept of patient-centred infertility care from Arab  
44 48 women's perspective by using a qualitative approach.
- 45 49 • The study included women only, so the applicability of this concept to males is not  
46 50 appropriate.
- 47 51 • Our study was limited by being conducted in a single city; therefore a multi-centre, cross-  
48 52 cultural study may provide results which are more generalisable.  
49 53  
50 54

51 55  
52 56  
53 57

54 58  
55 59  
56 60



## 55 INTRODUCTION

56 Infertility is a worldwide public health concern.[1] Globally, the estimated infertility rate ranges from  
57 3·5% to 26·4%; however, the burden of infertility is higher in developing countries where 1:4 couples  
58 experience fertility problems in their reproductive lives.[2-4]

59 The infertility care journey is invariably long and emotionally and psychosocially stressful.[5 6] Couples  
60 experiencing infertility frequently face difficulty in accessing infertility care—especially assisted  
61 reproductive technologies—as access varies widely across countries and regions, and is lowest in lower  
62 and middle income countries.[7]

63 Previously, conceptualisations of quality of infertility care focused on outcome measures.[8 9] However,  
64 this focus is changing, as patient-centred care (PCC) is being increasingly recognised as important for  
65 high-quality infertility care.[10-12] Patient-centred infertility care (PCIC) was studied among European  
66 couples experiencing infertility,[13 14] and the following 10 dimensions were identified: information  
67 provision, competence of clinic and staff, continuity and transition, coordination and integration,  
68 accessibility, physical comfort, attitude of and relationship with staff, communication, patient  
69 involvement and privacy, and emotional support.[10 13] These dimensions provided the basis and  
70 structure of the Patient-Centredness Questionnaire-Infertility, validated for use among European  
71 populations.[12]

72 A literature review conducted in 2017 failed to define PCIC from the perspective of Arab patients  
73 experiencing infertility; thus, the question remained unanswered.[15] What was validated in Europe  
74 might not be the case in the Arab world due to regional and cultural differences believed to affect  
75 infertility care, including counselling and treatment modalities.[16] Thus, we aimed to define PCIC from  
76 the perspective of Arab women with infertility.

77

## 78 **METHODS**

### 79 **Design**

80 This is a qualitative study using in-depth interviews (IDIs) to define PCIC from the perspective of Arab  
81 women experiencing infertility. PCIC is defined as infertility care that considers women's preferences,  
82 needs, and values, and entails their participation in all clinical decisions.[10] Ethical approvals were  
83 provided by the IRB of the Department of Medical Research and Studies; the Department, Directorate  
84 of Health Affairs, Ministry of Health, Jeddah, Saudi Arabia (number A00306); and the Universiti of  
85 Sains Malaysia (number USM/JEPeM/15020056, Date 03/11/2015). Continuing review application of  
86 the protocol was carried out yearly before data collection, which was conducted during the period  
87 2017-2018. Written informed consent was obtained from all participants.

### 88 **Study population**

89 Between January 2017 and December 2018, IDIs were conducted in Jeddah, Saudi Arabia. Inclusion  
90 criteria were Arab women who had received medical treatment for infertility during the six months  
91 preceding the interview, at any hospital in Jeddah. A purposive sample of 14 women were recruited,  
92 with maximum variation. The motive behind maximum variation sampling was to gain greater insight  
93 into PCIC by viewing it from different angles. Variations included age group, level of education,  
94 occupation, duration of marriage and infertility, infertility type, number of living children, treatment  
95 used, health facility visited, and duration of seeking infertility care. Participants were recruited  
96 purposefully until data saturation was reached and no new themes emerged.

### 97 **Data collection and analysis**

98 In-depth interviews were conducted via telephone. Researchers have found no real difference in the  
99 quality of data or the published papers when using telephone interviews compared to face-to-face  
100 interviews.[1] In addition, telephone interviews have many advantages, including being less intrusive,  
101 more cost effective, less time consuming, and involving less interview tension.[2] During the  
102 participant recruitment phase, the invited women reported that they would prefer telephone interviews  
103 over face-to-face ones. This interview method provided more anonymity and autonomy as the  
104 participants were asked to mention their given name only and they could choose the time, and the  
105 phone number to be called on. The length of the IDIs ranged from 45 to 90 minutes. All IDIs were

1  
2  
3 106 conducted by a female researcher, who is a family physician with experience in qualitative data  
4  
5 107 collection (HHW). An interview guide was used to collect data flexibly. Initially, the researcher  
6  
7 108 introduced herself as a researcher and family physician interested in patient-centred care. Then, each  
8  
9 109 participant was provided with a consent form, which included a clear explanation of the aim of the  
10  
11 110 study, and was asked to sign the form if he/she agreed to participate. The IDI guide consisted of two  
12  
13 111 parts; part one assessed participants' demographics, and part two included a question regarding medical  
14  
15 112 care received, followed by six open-ended questions regarding PCIC (Supplementary file 1). Each  
16  
17 113 interview was audio recorded, transcribed verbatim, translated from Arabic to English, then imported  
18  
19 114 into NVivo version 12 for analysis.

20  
21 115 Inductive thematic analysis: Inductive coding thematic analysis was applied to describe, compare and  
22  
23 116 relate findings, as patient centredness had not been defined from Arab patients' perspective. The first  
24  
25 117 step in the analysis was reading and re-reading the transcripts several times to become familiar with  
26  
27 118 emerging data. At this stage, notes were written by hand, summarising the main points and our initial  
28  
29 119 impressions. These notes focused on mapping out patients' experiences with fertility care received and  
30  
31 120 their definitions of PCIC. Next, HHW and TATI used line-by-line coding independently for each IDI.  
32  
33 121 Authors HHW and TATI examined the data to identify and agree on common themes, which were  
34  
35 122 analysed independently, whilst continuously developing and modifying codes. When we completed  
36  
37 123 coding for five IDIs, findings were discussed and modified before moving forward. Discrepancies were  
38  
39 124 discussed until consensus was reached. If consensus was not reached, that point was discussed with the  
40  
41 125 third author (SBI). Then, codes were categorised into preliminary subthemes and themes.

42  
43 126 Data saturation was reached on completion of fourteen IDIs, yielding 148 codes. Preliminary themes  
44  
45 127 were continuously reviewed and modified until we developed the final themes. Matrix queries  
46  
47 128 produced by NVivo were used to display the frequency of codes occurring within the text, or of codes  
48  
49 129 and participants' characteristics. This matrix enabled us to assess the degree of agreement among  
50  
51 130 participants and the nature of the associations.

52  
53 131 Four methods were adopted to enhance validity. First, different aspects of the same concept were  
54  
55 132 assessed. The IDI guide included six questions about PCIC; however, they were worded differently  
56  
57 133 asking about participants' positive and negative perceptions of care experience, what they needed from  
58  
59 134 infertility care, what would be an optimal situation, and, finally, a direct question about participants'

1  
2  
3 135 definitions of PCIC. Second, source triangulation was used by ensuring maximum variations in the  
4  
5 136 sample to explore PCIC from different viewpoints. Additionally, two gynaecologists were asked about  
6  
7 137 concerns in infertility care expressed by participants, such as waiting times and financial aspects. In  
8  
9 138 addition, after completion of data analysis, the PCIC dimensions that emerged from the current study  
10  
11 139 were compared with those identified by European participants, the only available PCIC dimensions  
12  
13 140 from patients' perspectives before our study. Third, analyst triangulation was applied, with three  
14  
15 141 analysts involved in reviewing the findings. Fourth, respondents' validation was sought. After data  
16  
17 142 analysis, we sent participants a summary of the PCIC dimensions and their items. All agreed that the  
18  
19 143 dimensions they preferred were included. Two respondents stressed avoiding long waiting times and  
20  
21 144 providing appropriate appointments for the purpose of follow-up visits. The results are reported  
22  
23 145 according to the Consolidated Criteria for Reporting Qualitative Research (COREQ).[17]  
24  
25 146 (Supplementary file 2)

26  
27 147 **Patient and public involvement** Patients were involved in the conduct and reporting of this research.  
28  
29 148 Please refer to the Methods section for further details.

30  
31  
32 149  
33  
34  
35  
36  
37  
38  
39  
40  
41  
42  
43  
44  
45  
46  
47  
48  
49  
50  
51  
52  
53  
54  
55  
56  
57  
58  
59  
60

150 **RESULTS**

151 Table 1 shows participants' demographics. Thematic analysis yielded three themes: (1) PCIC  
 152 dimensions, (2) PCIC definition and patient experiences, and (3) PCIC and health seeking behaviour  
 153 (HSB). The third theme included six subthemes. As shown in Figure 1, there was an interaction  
 154 between participants' definitions of PCIC and patient experience, HSB, and their sociodemographic  
 155 characteristics.

**Table 1: Characteristics of participants involved in in-depth interviews (n=14)**

| Participant characteristics                | Number(%)                         |             |
|--------------------------------------------|-----------------------------------|-------------|
| Age, year                                  | 25-                               | 5 (35·71%)  |
|                                            | 30-                               | 3 (21·43%)  |
|                                            | 35-                               | 3 (21·43%)  |
|                                            | 40-45                             | 3 (21·43%)  |
| Residency                                  | Jeddah                            | 10 (71·43%) |
|                                            | Out of Jeddah                     | 4 (28·57%)  |
| Duration of marriage, year                 | 1-                                | 7 (50·00%)  |
|                                            | 5-                                | 3 (21·43%)  |
|                                            | 10-                               | 1 (7·14%)   |
|                                            | 15-20                             | 3 (21·43%)  |
| Duration of infertility, year              | 1-                                | 7 (50·00%)  |
|                                            | 3-                                | 5 (35·71%)  |
|                                            | 6-                                | 1 (7·14%)   |
|                                            | 9-                                | 1 (7·14%)   |
| Duration of seeking infertility care, year | 1-                                | 8 (57·14%)  |
|                                            | 3-                                | 4 (28·57%)  |
|                                            | 6-                                | 2 (14·29%)  |
| Number of living children                  | 0                                 | 8 (57·14%)  |
|                                            | 1 or 2                            | 5 (35·71%)  |
|                                            | 3 or more                         | 1 (7·14%)   |
| Type of infertility                        | Primary                           | 5 (35·71%)  |
|                                            | Secondary                         | 9 (64·29%)  |
| Pregnant now                               | Yes                               | 2 (14·29%)  |
|                                            | No                                | 12 (85·71%) |
| Type of treatment used                     | Medical (OI*, hyperprolactinemia) | 13 (92·86%) |
|                                            | IUI†                              | 1 (7·14%)   |
|                                            | ICSI/IVF‡                         | 3 (21·43%)  |
|                                            | Surgical                          | 6 (42·86%)  |

\*OI; ovulation induction, †IUI; intrauterine insemination, ‡ICSI/IVF; Intracytoplasmic sperm injection/in-vitro fertilization.

156

157

158 **PCIC dimensions**

159 Nine PCIC dimensions were identified from 14 IDIs. Table 2 summarises the dimensions and each of  
 160 their items, ordered following a logical stream, similar to what patients experience during infertility  
 161 care.

**Table 2: Patient-centred infertility care (PCIC) dimensions from the perspective of Arab women experiencing infertility**

| PCIC dimensions                                          | PCIC items                                                                        |
|----------------------------------------------------------|-----------------------------------------------------------------------------------|
| Accessibility                                            | Availability of appropriate appointments                                          |
|                                                          | Ease of access to the health care facility                                        |
|                                                          | Smoothness of the process of booking appointment, registration & workflow         |
|                                                          | Justice in handling appointments & patient access                                 |
|                                                          | Providing easy access to doctors through phone & online consultations             |
|                                                          | Short waiting time                                                                |
| Minimising cost                                          | Vacancy (no overcrowding)                                                         |
|                                                          | Covering infertility care cost by insurance                                       |
|                                                          | Provision of infertility management in public sector free of charge               |
| Physical comfort                                         | Providing infertility care at reasonable, affordable cost                         |
|                                                          | Cleanliness                                                                       |
|                                                          | Comfortable environment                                                           |
| Privacy                                                  | Assistance and provision of care                                                  |
|                                                          | Pain avoidance and relieve                                                        |
|                                                          | Single dose, less frequent medication doses                                       |
|                                                          | Providing care in special department for women & infertility                      |
|                                                          | Providing female doctors or examiners                                             |
|                                                          | Avoiding over or unnecessarily exposing intimate parts of patient's body          |
|                                                          | Considering differences in privacy mean from patient to another                   |
|                                                          | Ensuring minimal interruption and number of people in, no men or other patients   |
| Taking patient permission before allowing more people in |                                                                                   |
| Staff attitude and communication                         | Preferring nobody knows about patient's infertility issues                        |
|                                                          | Considering differences in the preferences regarding husband involvement          |
|                                                          | Treating patient and other staff with dignity and respect                         |
|                                                          | Staff truthfulness                                                                |
|                                                          | Avoiding materialistic behaviour                                                  |
|                                                          | Practicing medicine in love and dedication                                        |
| Staff competence                                         | Being so patient                                                                  |
|                                                          | Religious approach                                                                |
|                                                          | well-known doctors                                                                |
|                                                          | Proper and accurate evaluation; history, examination and investigations as needed |
|                                                          | Understanding the patient fast and well                                           |
|                                                          | Providing diagnosis and curative solutions                                        |
|                                                          | Avoiding medications with bad side effects                                        |
|                                                          | Providing comprehensive and personalized care                                     |

| Qualification                               |                                                                                                                                                              |
|---------------------------------------------|--------------------------------------------------------------------------------------------------------------------------------------------------------------|
| (Table 2 continues on next page)            |                                                                                                                                                              |
| PCIC dimensions                             | PCIC items                                                                                                                                                   |
| Information and education                   | Giving and taking, encouraging discussion and negotiation                                                                                                    |
|                                             | Providing relevant information about the patient status, progress, and prognosis                                                                             |
|                                             | Disclosure and clarification of all treatment options                                                                                                        |
|                                             | Providing information on processes of care before each step, what to expect before, during and after procedures, then home care, plan of care, and follow up |
|                                             | Informing patient about the use, expected effects, and possible side effects before starting treatment                                                       |
|                                             | Providing relevant information with adequate explanation                                                                                                     |
|                                             | Talking to patients with simple understandable language                                                                                                      |
|                                             | Welcoming patient questions and providing answers thought health care journey.                                                                               |
|                                             | Raising health awareness and education through school education, doctors in clinics, and campaigns                                                           |
|                                             | Considering the patient's long experience as an expert in her case                                                                                           |
| Psychological and emotional support         | Listening to patients                                                                                                                                        |
|                                             | Considering the patient's personal situation                                                                                                                 |
|                                             | Preparing patient psychologically throughout her treatment journey                                                                                           |
|                                             | Giving patient realistic hope                                                                                                                                |
|                                             | Avoiding using destroying words or attitude, or pointing finger at the patient                                                                               |
| Continuity and coordination of care         | Ensuring ongoing support and motivation                                                                                                                      |
|                                             | Studying the patient case well including proper documentation and up to date file review                                                                     |
|                                             | Treating couple as one case                                                                                                                                  |
|                                             | Developing and sharing detailed plan of care from the start                                                                                                  |
|                                             | Ongoing planning, follow up and coordination of care hand on hand with the patient based on health situations and patient needs                              |
|                                             | Providing follow up with the same doctor                                                                                                                     |
|                                             | Including doctors from same specialty and other specialties as needed                                                                                        |
|                                             | Facilitating the shortest treatment journey                                                                                                                  |
| Encouraging lady's check-up before marriage |                                                                                                                                                              |

162

163 All participants mentioned four dimensions as important elements of PCIC: accessibility (short waiting  
164 times), minimising cost (providing infertility care at a reasonable, affordable cost), information and  
165 education (providing relevant information with adequate explanation), and staff attitudes and  
166 communication (treating patients and other staff with dignity and respect). Information from  
167 obstetricians/gynaecologists supported participants' perspectives regarding waiting times and costs.  
168 Despite being noted as important dimensions, participants' preferences varied regarding maximum  
169 waiting times, relevant information, and privacy during infertility care. These preferences were affected

170 to some extent by participants' educational level, infertility care experience, and marital relationship  
 171 quality. Table 3 compares these dimensions with the European PCIC model.

**Table 3: Comparison between the Arab and European Patient-centred infertility care (PCIC) dimensions**

| Arab PCIC dimensions                   | European PCIC dimensions                                          |
|----------------------------------------|-------------------------------------------------------------------|
| 1. Accessibility                       | 1. Accessibility                                                  |
| 2. Minimizing cost*                    | ..                                                                |
| 3. Physical comfort                    | 2. Physical comfort                                               |
| 4. Privacy                             | 3. Patient involvement* and privacy                               |
| 5. Staff attitude and communication    | 4. Attitude of and relationship with staff                        |
|                                        | 5. Communication                                                  |
| 6. Staff competence                    | 6. Competence of clinic and staff                                 |
| 7. Information and education           | 7. Information provision                                          |
| 8. Psychological and emotional support | 8. Emotional support                                              |
| 9. Continuity and coordination of care | 9. Coordination and integration,<br>10. continuity and transition |

\*Indicates the dimension mentioned in one model only

172

### 173 **PCIC definition and patient experience**

174 When asked to define PCIC, participants provided short definitions focused on a few points, although  
 175 they mentioned much more during the preceding questions about their infertility care experience. The  
 176 panel (Supplementary file 3) shows participants' definitions of PCIC and summarises each participant's  
 177 experience.

178 Most participants had a dominant issue during infertility care. These issues were related to the medical  
 179 care itself or sociodemographic circumstances. Participant experience shaped participants' definitions  
 180 of PCIC the most, as shown in the panel.

### 181 **PCIC and HSB**

182 PCIC dimensions influenced participants' HSB, as suggested by the following HSB subthemes.



1  
2  
3 183 1. Self-medication  
4  
5

6 184 Participants practiced two methods of self-medication: obtaining non-prescribed medications, and  
7  
8 185 using traditional or herbal medicines.  
9

10 186 The first method is not a responsible form of self-medication, based on the WHO's definition [18]. One  
11  
12 187 patient used ovulation induction medications (Clomiphene citrate tablets, Menotropin injections, and  
13  
14 188 Choriomon injections) in high doses, reaching double the dosage prescribed by her physicians. All  
15  
16 189 were prescription-only medications.  
17

18  
19 190 *'I used to order images for myself for ovulation. I knew the size of the egg, they (doctors) got annoyed!*  
20  
21 191 *Yes, I would get the image and ask for a trigger shot, because sometimes we had sex before meeting the*  
22  
23 192 *doctor. I wanted to know, but sometimes you do not find the answer you are looking for.... Now I knew*  
24  
25 193 *that if the egg was more than 15, I should take the trigger shot'*, Participant 10, secondary infertility  
26

27 194 She did not ask her doctors to increase the dose, because she felt that they were 'fed up' with her many  
28  
29 195 questions and requests. Additionally, appointments were far in the future; therefore, if she waited to  
30  
31 196 meet her physician each time to obtain the prescription, she would have a very long treatment journey.  
32

33  
34 197 For the second method, most participants (12 out of 14) used traditional and/or herbal medicine during  
35  
36 198 infertility care. Remedies included herbs, honey, cupping therapy (Hijamah), massage, and Qur'anic  
37  
38 199 verses read to achieve improvement (Roqia). Participants had different attitudes towards this kind of  
39  
40 200 medicine. Some preferred it over modern medicine, as they considered modern medicines to be harmful  
41  
42 201 chemicals, while traditional medicine is natural, and therefore harmless. Others were cautious with  
43  
44 202 herbs, as safe and effective dosage is unknown. The majority preferred to use both traditional and  
45  
46 203 modern medicine, as traditional medicine is safe and accessible, and modern medicine failed to solve  
47  
48 204 several of their infertility problems.  
49

50 205 2. Doctor shopping  
51

52  
53 206 Some participants would visit more than one infertility doctor for the same complaint during the same  
54  
55 207 time period. Participant 8 used to seek four different doctors' opinions before undergoing any  
56  
57 208 procedure, to ensure it was the correct decision. This patient had recurrent pregnancy loss and  
58  
59 209 discovered she was not examined properly, which eventually cost her a lot of money in diagnosing and  
60

1  
2  
3 210 treating the cause. Participant 12 was following up with an infertility doctor, then decided to shift to  
4  
5 211 another doctor after failed IVF due to low sperm quality. The reason was a lack of honesty, as this  
6  
7 212 participant knew indirectly after her failed IVF procedure that there was a high possibility of IVF  
8  
9 213 failure; however, the physician did not disclose that. Additionally, participants sought second opinions  
10  
11 214 while still following up with their primary physician because their physician did not give a contact  
12  
13 215 number, provided inadequate information, or did not disclose all available options. Some women  
14  
15 216 changed physicians, or even hospitals, due to failure to provide a clear plan from the start, failure to  
16  
17 217 reach a diagnosis and order important tests, doctors' offensive behaviour, poor communication, or  
18  
19 218 physical discomfort.

### 21 219 3. Stopping infertility care

22  
23  
24 220 Some participants stopped seeking infertility care, although they still needed it. Women can face many  
25  
26 221 obstacles during infertility care, and they commonly try to overcome these obstacles to get pregnant.  
27  
28 222 The major obstacle that led participants to stop seeking care was cost, which was described as  
29  
30 223 'horrible'. Other obstacles, such as lack of support and cooperation from husbands, also contributed,  
31  
32 224 but did not lead to complete discontinuation.

33  
34 225 *'Images and tests and so-on!! we paid a large sum of money! And not covered by insurance... Actually,*  
35  
36 226 *the cost should not be huge. It should not be purely materialistic'*, Participant 13, primary infertility.

### 37 38 39 227 4. Avoiding public hospitals and preferring expensive private care

40  
41  
42 228 Although cost was a major barrier to accessing infertility care, several participants surprisingly chose to  
43  
44 229 seek care in the expensive private sector. The reasons included poor environment in government  
45  
46 230 hospitals, difficulty booking appropriate appointments, and long waiting times. An important factor  
47  
48 231 was the unavailability of infertility units and important services (e.g. IVF) in general government  
49  
50 232 hospitals. Therefore, couples experiencing infertility received care in the general  
51  
52 233 obstetrics/gynaecology clinics.

53  
54 234 *'So, I never mind paying the blood of my heart (all what I have) to go to a place where I'm comfortable*  
55  
56 235 *psychologically while I'm receiving care, in order to not end up with a bad experience or a bad smell*  
57  
58 236 *in my memory (the bad smell in some low-quality hospitals)'*, Participant 5, primary infertility.  
59  
60

237 5. Seeking care from unqualified therapists, which could cause harm

238 Participants sought care from unknown individuals who posted on social media. Participant 10  
239 followed a woman on Instagram who posted prescriptions related to an ovulation induction technique  
240 involving three drugs. Participant 12 received an advertisement online from a person claiming to have  
241 medicines that are not available in Saudi Arabia that he could ship at a high cost. That medicine was  
242 not licensed by the FDA and not sold in pharmacies anywhere. Participant 7 visited an unlicensed  
243 massage therapist who claimed she could correct the position of one's womb. These behaviours were  
244 attributed to the failure of physicians to reach a diagnosis or successfully treat the problem.  
245 Furthermore, the unqualified individuals tended to communicate well, take a detailed history, provide  
246 adequate information, and were easy to access and highly responsive.

247 *'Imagine, he asked me questions I'd never been asked by any of the doctors I'd visited here!'*

248 Participant 12, primary infertility.

249 6. Seeking care despite dissatisfaction with services

250 Achieving some dimensions of PCIC, such as a doctor's competence and communication skills, offset  
251 the absence of others, thereby encouraging participants to seek care. Many participants visited an  
252 infertility care facility they did not like because they were looking for specific physicians. Thus, a good  
253 doctor's communication skills and competence supported seeking infertility care and encouraged  
254 participants to temporarily overlook physical discomfort.

255 **DISCUSSION**

256 In the current study, PCIC was defined across nine dimensions, from the perspectives of Arab women  
257 experiencing infertility. All participants agreed on four dimensions: accessibility, minimising cost,  
258 information and education, and staff attitudes and communication. The five remaining dimensions were  
259 staff competence, physical comfort, privacy, continuity and coordination of care, and psychological and  
260 emotional support. PCIC had three major contributors: participants' demographics, patient experience  
261 with infertility care, and HSB.

262 Comparing These PCIC dimensions were similar, to some extent, to those developed by Dancet et al.  
263 from across Europe (European PCIC-model; Table 3).[14] There were substantial differences,  
264 however. First, minimising cost was highly valued by our participants, but absent in the European

1  
2  
3 265 model. Similarly, patient involvement, which was included in the European model, was not mentioned  
4  
5 266 by our participants. Second, prioritisation of the dimensions differed. For example, accessibility, a  
6  
7 267 dimension agreed upon by all our participants, was among the least prioritised by European  
8  
9 268 participants. Third, even dimensions included in both models showed some differences in preferences  
10  
11 269 and needs between Arab and European groups. For example, concerning provision of information, our  
12  
13 270 participants focused on deficient information during treatment at the health facility; however, the  
14  
15 271 European model included the more ambitious addition of receiving information on media, such as  
16  
17 272 DVD media. These three differences reflect Arab women's low expectations in relation to European  
18  
19 273 women. They mainly focused on unmet needs, which shaped the majority of PCIC definitions in our  
20  
21 274 study.

22  
23 275 Maslow's hierarchy of needs explains this pattern well.[19] It is a motivational theory comprising a  
24  
25 276 five-tier model of human needs; needs lower in the hierarchy must be satisfied before individuals can  
26  
27 277 attend to higher needs. These needs are divided into deficiency (basic) needs (physiological, safety,  
28  
29 278 love and belonging, and esteem) and growth needs (self-actualisation). Self-actualised people use their  
30  
31 279 full potential.[19] Figure 2 shows Maslow's hierarchy of needs, as adapted to PCIC. Notably, it was  
32  
33 280 difficult to sort dimensions by need categories when adapting Maslow's hierarchy to PCIC, as each  
34  
35 281 dimension could include a mixture of deficiency and growth needs. For example, information provision  
36  
37 282 could be a basic need (e.g. how to use a medication) or a growth need (e.g. detailed knowledge on IVF  
38  
39 283 procedures to facilitate decision-making). The hierarchy indicates that participants focused on  
40  
41 284 deficiency needs, as all nine dimensions are within the deficiency needs zone and did not reach self-  
42  
43 285 actualisation. The IDI transcripts showed low expectations among participants, with few exceptions.  
44  
45 286 Based on Maslow's hierarchy, this indicates that participants' deficiency needs were not covered, and  
46  
47 287 they continued to struggle to receive infertility care. Thus, PCIC is expected to help Arab women  
48  
49 288 experiencing infertility satisfy their deficiency needs and become motivated to achieve self-  
50  
51 289 actualisation, thereby empowering them to participate in infertility care.

52  
53 290 The current study found that the PCIC definition was shaped by the patient experience with infertility  
54  
55 291 care. This finding indicates that this definition is dynamic and not static. The patient may provide  
56  
57 292 different preferences if the concept was to be explored at different time points.  
58  
59  
60

1  
2  
3 293 To the best of our knowledge, this is the first study that showed a possible association between PCC  
4  
5 294 and HSB. Generally, seeking infertility medical care has been shown to relate to prior experience with  
6  
7 295 doctors.[20] In line with our findings, self-medication has been associated with some dimensions of  
8  
9 296 PCC, including accessibility (especially lack of insurance coverage),[21 22] knowledge,[23] physical  
10  
11 297 comfort,[23] and dissatisfaction with health care providers.[18] Huppelschoten and colleagues found  
12  
13 298 no relation of PCIC with drop-out.[24] Our findings suggested the opposite, as PCIC was related to  
14  
15 299 discontinuation of treatment and changing doctors or hospitals. Sansone and Sansone supported that  
16  
17 300 inconvenient clinician factors promote doctor shopping.[25] Unlike other forms of HSB, using  
18  
19 301 traditional and spiritual treatments was related to beliefs and preferences that favoured such treatments  
20  
21 302 over conventional medicine, in line with previous studies.[20 26 27]

### 23 303 **Limitations**

24  
25  
26 304 Regarding limitations, our study was conducted in a single city. Collecting data from across Saudi  
27  
28 305 Arabia, or more than one country in the Arab world, was infeasible due to a lack of funding. The  
29  
30 306 current study highlighted the possible effect of PCIC on HSB; however, this association could not be  
31  
32 307 confirmed due to the nature of qualitative research. Future quantitative studies are needed to confirm  
33  
34 308 the association and, if proven, to consider HSB as an indicator of PCIC.

### 36 309 **CONCLUSION**

37  
38  
39 310 This study identified nine PCIC dimensions and items, which reflect the definition of PCIC and can  
40  
41 311 guide efforts to improve the quality of Arab infertility care. Clear differences between the Arab and the  
42  
43 312 European PCIC model were found. Our findings led us to conclude that women continue to exhibit  
44  
45 313 unmet basic needs. We hope this study will prompt further research regarding PCIC in the Arab world  
46  
47 314 and thereby provide more implications for improving the quality of infertility care and quality of life  
48  
49 315 for women who experience infertility. This study created a list of PCIC dimensions and items but did  
50  
51 316 not develop a tool to measure PCIC. Thus, further work is recommended to develop a validated tool for  
52  
53 317 measuring PCIC from Arab patients' perspectives.

### 55 318 **Acknowledgement**

56  
57  
58 319 We would like to thank the women and gynaecologist who participated in the study. We also would  
59 320 like to thank Editage ([www.editage.com](http://www.editage.com)) for English language editing of our manuscript.

1  
2  
3 321 **Author Contributions**

4 322 HHW, TATI, and SBI contributed to the study design. HHW and AJK collected the data. HHW, TATI,  
5 323 SBI, and AJK performed the data analysis and interpretation. HHW wrote the first draft of the article  
6 324 and all authors contributed to subsequent revisions.

8 325 **Funding** This research received no specific grant from any funding agency in the public, commercial  
9 326 or not-for-profit sectors.

11 327 **Competing interests** None declared.

13 328 **Patient consent for publication** Not applicable.

15 329 **Ethics approval** The study proposal was reviewed and approved by the IRB of the Department of  
16 330 Medical Research and Studies, Directorate of Health Affairs, Ministry of Health, Jeddah, Saudi Arabia  
17 331 (number A00306); and the Human Research and Ethics Committee of Universiti Sains Malaysia  
18 332 (Number USM/JEPeM/15020056, Date 03/11/2015). The study was performed in accordance with the  
19 333 ethical standards as laid down in the 1964 Declaration of Helsinki and its later amendments. Informed  
20 334 consent was obtained from all participants. Respondents' privacy and confidentiality were assured.

22 335 **Provenance and peer review:** Not commissioned; externally peer reviewed.

24 336 **Data availability statement:** All data relevant to the study are included in the article or uploaded as  
25 337 supplementary information.

27 338 **Supplementary data**

29 339 Supplementary file 1: in-depth interview guide

31 340 Supplementary file 2: COREQ checklist for qualitative research

33 341 Supplementary file3: quotations showing participants' definitions of patient-centred infertility care

35 342 (PCIC) and dominant events in each patient's experience

37 343 **Figures:**

39 344 Figure 1 Diagram shows the interaction between PCIC definition and patient experience, psychosocio-  
41 345 demographic features, and health seeking behaviour (rectangles)

43 346 Figure 2 Maslow's Hierarchy of Patient-centred infertility care (PCIC)

45 347

46  
47  
48  
49  
50  
51  
52  
53  
54  
55  
56  
57  
58  
59  
60

348 **References**

- 349 1. Macaluso M, Wright-Schnapp TJ, Chandra A, et al. A public health focus on infertility prevention,  
350 detection, and management. *Fertility and sterility* 2010;93(1):16.e1-10. doi:  
351 10.1016/j.fertnstert.2008.09.046 [published Online First: 2008/11/11]
- 352 2. WHO. Sexual and reproductive health: Infertility is a global public health issue [Internet].  
353 [Available from: <https://www.who.int/reproductivehealth/topics/infertility/perspective/en/>  
354 (accessed Nov 10, 2019).
- 355 3. Mascarenhas MN, Flaxman SR, Boerma T, et al. National, regional, and global trends in infertility  
356 prevalence since 1990: a systematic analysis of 277 health surveys. *PLoS Med*  
357 2012;9(12):e1001356.
- 358 4. Lemoine M-E, Ravitsky V. Toward a Public Health Approach to Infertility: The Ethical Dimensions  
359 of Infertility Prevention. *Public Health Ethics* 2013;6(3):287-301. doi: 10.1093/phe/pht026
- 360 5. Alesi R. Infertility and its treatment-an emotional roller coaster. *Aust J Gen Pract* 2005;34(3):135.
- 361 6. Huppelschoten AG, Nelen WL, Westert GP, et al. Improving patient-centredness in partnership with  
362 female patients: a cluster RCT in fertility care. *Human reproduction (Oxford, England)*  
363 2015;30(5):1137-45. doi: 10.1093/humrep/dev041 [published Online First: 2015/03/10]
- 364 7. Adamson GD, de Mouzon J, Chambers GM, et al. International Committee for Monitoring Assisted  
365 Reproductive Technology: world report on assisted reproductive technology, 2011. *Fertility*  
366 *and sterility* 2018;110(6):1067-80. doi: 10.1016/j.fertnstert.2018.06.039 [published Online  
367 First: 2018/11/07]
- 368 8. de Mouzon J, Goossens V, Bhattacharya S, et al. Assisted reproductive technology in Europe, 2006:  
369 results generated from European registers by ESHRE. *Human reproduction (Oxford, England)*  
370 2010;deq124.
- 371 9. Nyboe AA, Goossens V, Bhattacharya S, et al. Assisted reproductive technology and intrauterine  
372 inseminations in Europe, 2005: results generated from European registers by ESHRE:  
373 ESHRE. The European IVF Monitoring Programme (EIM), for the European Society of  
374 Human Reproduction and Embryology (ESHRE). *Human reproduction (Oxford, England)*  
375 2009;24(6):1267-87.
- 376 10. Institute of Medicine. Crossing the quality chasm: A new health system for the 21st century.  
377 Washington, DC: National Academies Press 2001.
- 378 11. Dancet E, Nelen W, Sermeus W, et al. The patients' perspective on fertility care: a systematic  
379 review. *Hum Reprod Update* 2010;dmq004.
- 380 12. van Empel IW, Aarts JW, Cohlen BJ, et al. Measuring patient-centredness, the neglected outcome  
381 in fertility care: a random multicentre validation study. *Human reproduction (Oxford,*  
382 *England)* 2010;25(10):2516-26.
- 383 13. Dancet EA, Van Empel IW, Rober P, et al. Patient-centred infertility care: a qualitative study to  
384 listen to the patient's voice. *Human reproduction (Oxford, England)* 2011;26(4):827-33. doi:  
385 10.1093/humrep/der022 [published Online First: 2011/02/15]
- 386 14. Dancet EA, D'Hooghe TM, Sermeus W, et al. Patients from across Europe have similar views on  
387 patient-centred care: an international multilingual qualitative study in infertility care. *Human*  
388 *reproduction (Oxford, England)* 2012;27(6):1702-11. [published Online First: 2012/03/20]
- 389 15. Webair HH, Ismail TAT, Ismail SB. Patient-centered infertility care from an Arab perspective: A  
390 review study. *Middle East Fertil Soc J* 2018;23(1):8-13.

- 1  
2  
3 391 16. Lawrenz B, Coughlan C, Melado L, et al. Ethnical and sociocultural differences causing infertility  
4 392 are poorly understood-insights from the Arabian perspective. *J Assist Reprod Genet*  
5 393 2019;36(4):661-65. doi: 10.1007/s10815-019-01411-2 [published Online First: 2019/01/28]  
6  
7 394 17. Tong A, Sainsbury P, Craig J. Consolidated criteria for reporting qualitative research (COREQ): a  
8 395 32-item checklist for interviews and focus groups. *International journal for quality in health*  
9 396 *care* 2007;19(6):349-57.  
10  
11 397 18. Alghanim S. Self-medication practice among patients in a public health care system. *East Mediterr*  
12 398 *Health J* 2011;17(5):409-16.  
13  
14 399 19. Maslow A. Motivation and personality. 2nd ed. New York: Harper and Row 1970.  
15  
16 400 20. White L, McQuillan J, Greil AL. Explaining disparities in treatment seeking: the case of infertility.  
17 401 *Fertility and sterility* 2006;85(4):853-57. doi: <https://doi.org/10.1016/j.fertnstert.2005.11.039>  
18  
19 402 21. Pagán JA, Ross S, Yau J, et al. Self-medication and health insurance coverage in Mexico. *Health*  
20 403 *Policy* 2006;75(2):170-77. doi: <https://doi.org/10.1016/j.healthpol.2005.03.007>  
21  
22 404 22. Shaghghi A, Asadi M, Allahverdipour H. Predictors of Self-Medication Behavior: A Systematic  
23 405 Review. *Iran J Public Health* 2014;43(2):136-46.  
24  
25 406 23. Dyer SJ. Infertility-related reproductive health knowledge and help-seeking behaviour in African  
26 407 countries. *ESHRE Monographs* 2008;2008(1):29-33. doi: 10.1093/humrep/den148  
27  
28 408 24. Huppelschoten AG, van Dongen AJCM, Philipse ICP, et al. Predicting dropout in fertility care: a  
29 409 longitudinal study on patient-centredness. *Human reproduction (Oxford, England)*  
30 410 2013;28(8):2177-86. doi: 10.1093/humrep/det236  
31  
32 411 25. Sansone RA, Sansone LA. Doctor shopping: a phenomenon of many themes. *Innov Clin Neurosci*  
33 412 2012;9(11-12):42-46.  
34  
35 413 26. Aydin S, Bozkaya AO, Mazicioglu MM, et al. What influences herbal medicine use?-prevalence  
36 414 and related factors. *Turk J Med Sci* 2008;38(5):455-63.  
37  
38 415 27. Nahar P. Health seeking behaviour of childless women in Bangladesh: An ethnographic exploration  
39 416 for the special issue on: Loss in child bearing. *Soc Sci Med* 2010;71(10):1780-87. doi:  
40 417 <https://doi.org/10.1016/j.socscimed.2010.07.026>  
41 418  
42  
43  
44  
45  
46  
47  
48  
49  
50  
51  
52  
53  
54  
55  
56  
57  
58  
59  
60



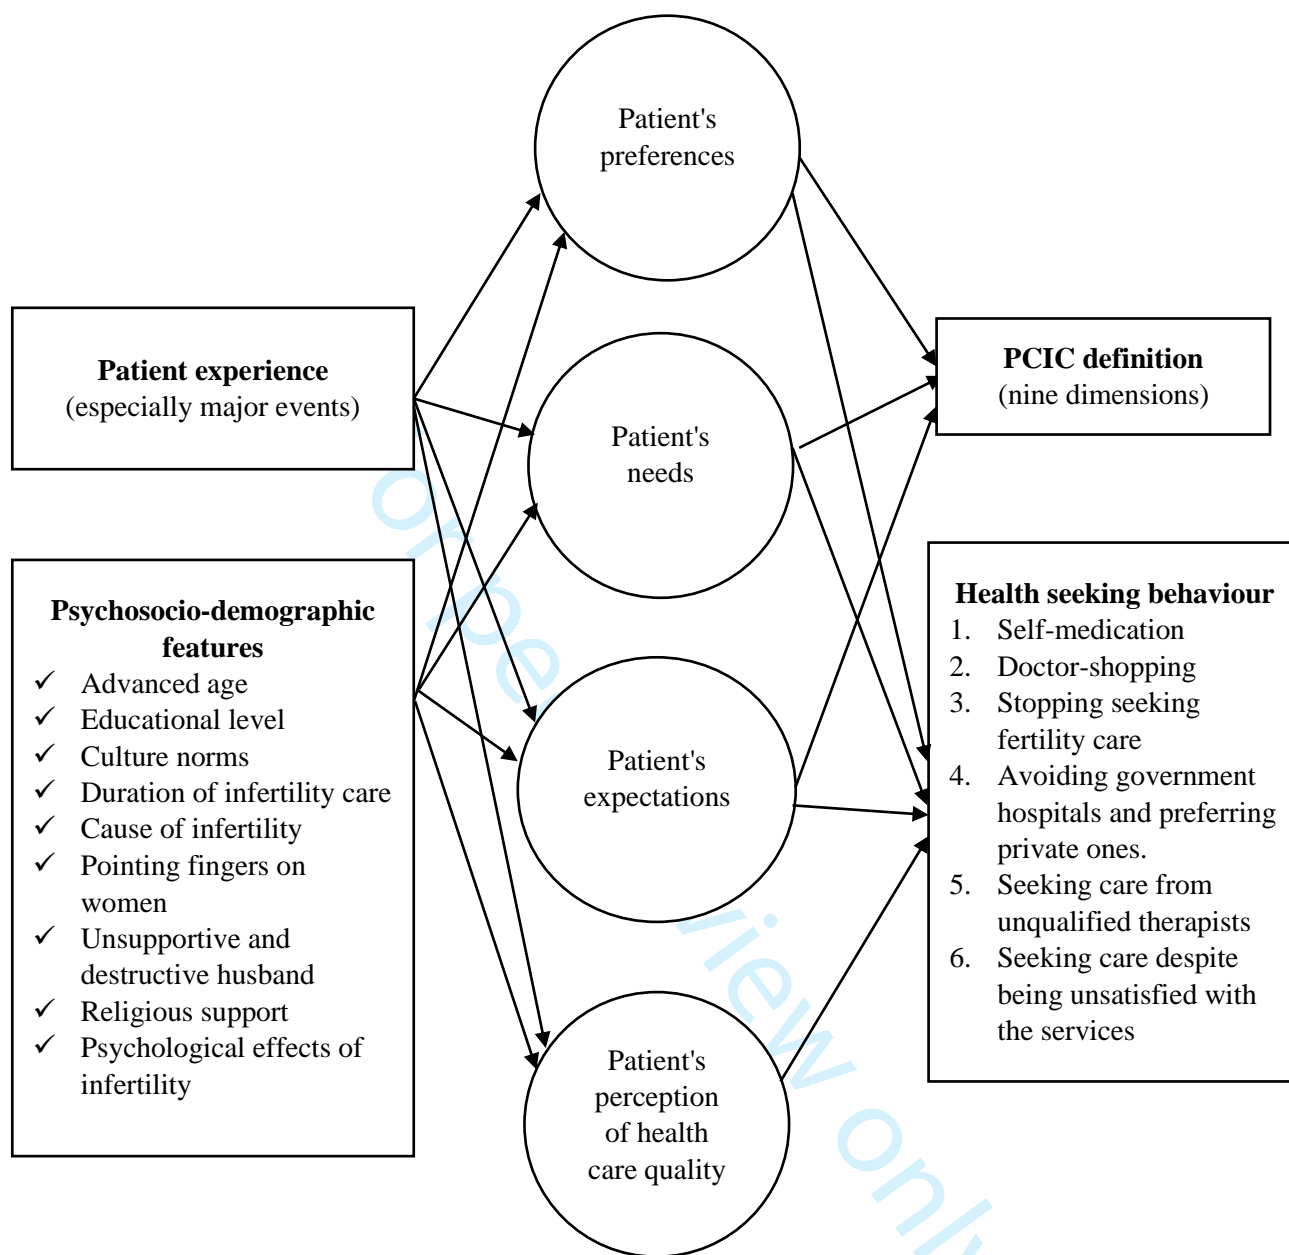

1  
2  
3  
4  
5  
6  
7  
8  
9  
10  
11  
12  
13  
14  
15  
16  
17  
18  
19  
20  
21  
22  
23  
24  
25  
26  
27  
28  
29  
30  
31  
32  
33  
34  
35  
36  
37  
38  
39  
40  
41

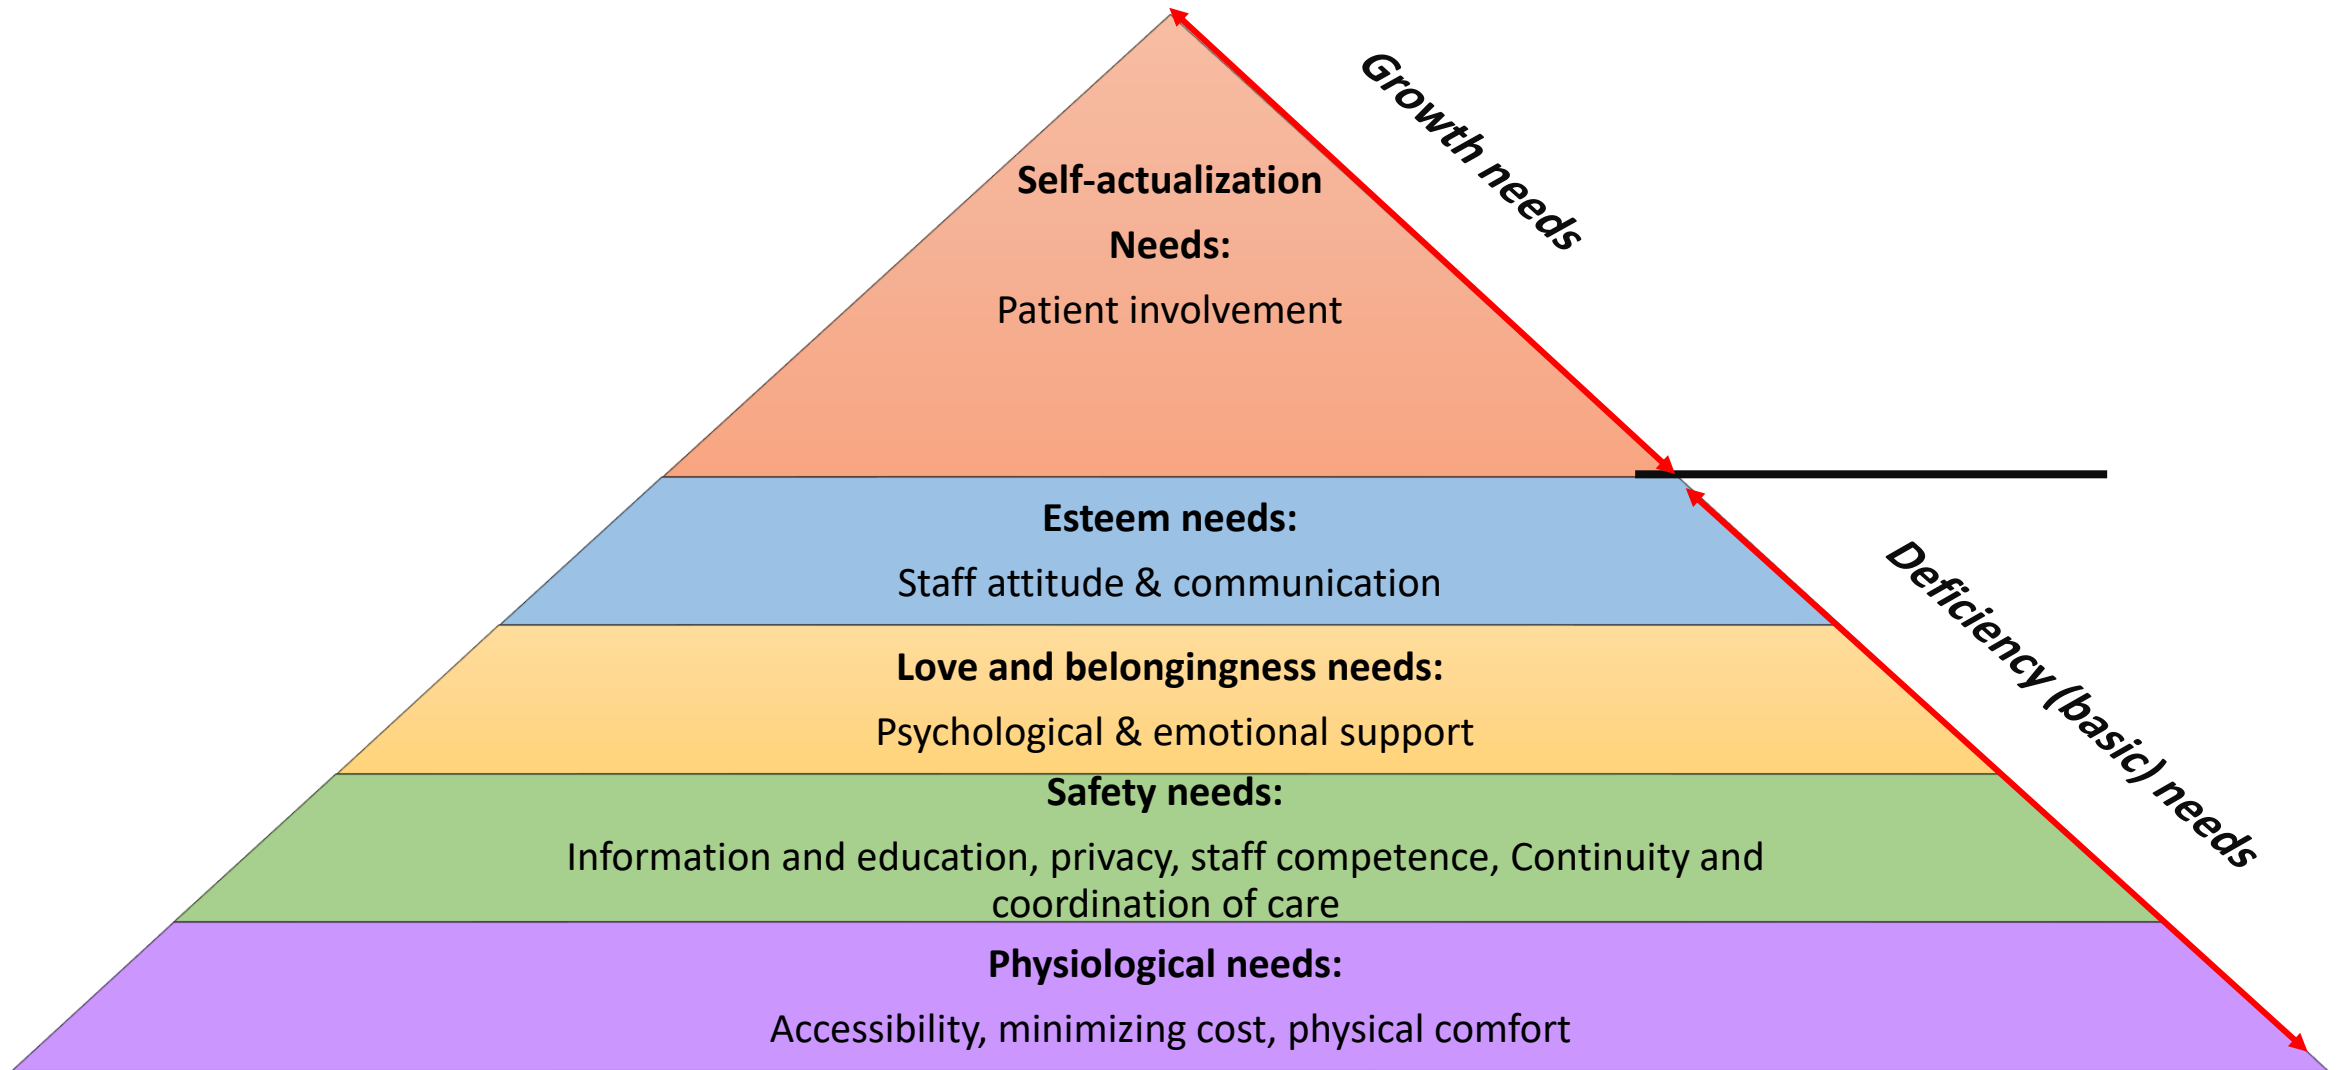

1

2  
3 **Title** Patient-centred infertility care among Arab women experiencing infertility: a qualitative study  
4

5 **Journal name:** BMJ Open  
6

7 **Authors**  
8

9 Hana Hasan Webair<sup>1,2\*</sup>,

10  
11 Tengku Alina Tengku Ismail<sup>3</sup>,

12  
13 Shaiful Bahari Ismail<sup>1</sup>,

14  
15 Azza Jameel Khaffaji<sup>4</sup>  
16

17 <sup>1</sup>Department of Family Medicine, School of Medical Sciences, Universiti Sains Malaysia, Health  
18 Campus, 16150 Kubang Kerian, Kelantan, Malaysia  
19

20 <sup>2</sup>Department of Family Medicine, Hadhramout University, College of Medicine, PO Box 50512,  
21 Mukalla, Hadhramaut, Yemen  
22

23 <sup>3</sup>Department of Community Medicine, School of Medical Sciences, Universiti Sains Malaysia, Health  
24 Campus, 16150 Kubang Kerian, Kelantan, Malaysia  
25

26 <sup>4</sup>Obstetrics and Gynaecology Department, King Abdulaziz Hospital, Ministry of Health, P.O.Box  
27 31467 Jeddah 21497, Saudi Arabia  
28

29 \*Corresponding address: MSc, Department of Family Medicine, School of Medical Sciences,  
30 Universiti Sains Malaysia, Health Campus, 16150 Kubang Kerian, Kelantan, Malaysia. Email;  
31 hhwebair@gmail.com. Tel: +601126502099.  
32  
33  
34  
35  
36  
37  
38  
39  
40  
41  
42  
43  
44  
45  
46  
47  
48  
49  
50  
51  
52  
53  
54  
55  
56  
57  
58  
59  
60

## In-depth Interview Guide

### Background Information

|                                                                                                                                                                                                                                           |                                                                    |
|-------------------------------------------------------------------------------------------------------------------------------------------------------------------------------------------------------------------------------------------|--------------------------------------------------------------------|
| ID:                                                                                                                                                                                                                                       |                                                                    |
| <b>Personal data</b>                                                                                                                                                                                                                      |                                                                    |
| Age (years):                                                                                                                                                                                                                              | Sex: <input type="checkbox"/> Male <input type="checkbox"/> Female |
| Education: <input type="checkbox"/> Illiterate <input type="checkbox"/> Primary <input type="checkbox"/> Secondary<br><input type="checkbox"/> Diploma <input type="checkbox"/> Bachelor <input type="checkbox"/> Master or higher        |                                                                    |
| Occupation                                                                                                                                                                                                                                | Address                                                            |
| <b>Infertility-related data</b>                                                                                                                                                                                                           |                                                                    |
| Duration of marriage (months):                                                                                                                                                                                                            | Duration of infertility (months):                                  |
| Duration of seeking fertility care (months):                                                                                                                                                                                              | No of pregnancies:                                                 |
| No. of live children:                                                                                                                                                                                                                     | Cause of infertility:                                              |
| Are you (your wife) pregnant now? <input type="checkbox"/> Yes <input type="checkbox"/> No                                                                                                                                                |                                                                    |
| Where you had received fertility care; please write the name of clinic and hospital. If you sought more than one clinic, please mention them chronologically and specify the period in front of each.<br>.....<br>.....<br>.....<br>..... |                                                                    |

**In-depth Interview Guide (con'd)**

|                             |                                                                                                                                                                                                                                                                                                                                                                                                                                                                                                                                                                                                                                                                                                                                                                                                                                                                    |
|-----------------------------|--------------------------------------------------------------------------------------------------------------------------------------------------------------------------------------------------------------------------------------------------------------------------------------------------------------------------------------------------------------------------------------------------------------------------------------------------------------------------------------------------------------------------------------------------------------------------------------------------------------------------------------------------------------------------------------------------------------------------------------------------------------------------------------------------------------------------------------------------------------------|
| Introduction Key Components | <ul style="list-style-type: none"> <li>✓ Participant name and personal data</li> <li>✓ Research information</li> <li>✓ Signature of consent</li> </ul>                                                                                                                                                                                                                                                                                                                                                                                                                                                                                                                                                                                                                                                                                                             |
| Questions                   | <ol style="list-style-type: none"> <li>1. What types of infertility medical care have you received?</li> <li>2. What characteristics of infertility care, would you recommend be sustained and/or introduced? Please provide a justification for your response.</li> <li>3. What are the things you have missed in your infertility care?</li> <li>4. What do you think will work well in increasing utilization of infertility care? Please explain</li> <li>5. How would you recommend for future infertility care?</li> <li>6. If all what you have recommended above are made available, would you seek other non-medical source of care for infertility? Please justify</li> <li>7. What are the elements of patient-centered fertility care from your point of view? Please elaborate</li> </ol> <p><u>N.B.</u></p> <p>-Probes should be used as needed.</p> |
| Closing Key Components      | <ul style="list-style-type: none"> <li>✓ Is there anything more you would like to add?</li> <li>✓ I'll be analyzing the information you and others gave me. I'll be happy to send you a copy of the result, if you are interested.</li> <li>✓ Thank you for your time.</li> </ul>                                                                                                                                                                                                                                                                                                                                                                                                                                                                                                                                                                                  |

## دليل المقابلة المتعمقة

|                                                                                                                                                                                                                                                                                                                                                                                                                                                                                                                                                                                                                                                                                    |                                |
|------------------------------------------------------------------------------------------------------------------------------------------------------------------------------------------------------------------------------------------------------------------------------------------------------------------------------------------------------------------------------------------------------------------------------------------------------------------------------------------------------------------------------------------------------------------------------------------------------------------------------------------------------------------------------------|--------------------------------|
| <p>✓ البيانات الشخصية</p> <p>✓ معلومات حول البحث</p> <p>✓ التوقيع على الموافقة</p>                                                                                                                                                                                                                                                                                                                                                                                                                                                                                                                                                                                                 | <p>مكونات المقدمة الرئيسية</p> |
| <p>١. ماهي أنواع الرعاية الطبية لتأخر الحمل التي خضعت لها من قبل؟</p> <p>٢. ماهي مواصفات الرعاية الصحية لتأخر الحمل التي توصين أن نبقى عليها أو نستحدثها؟ أرجو تبرير جابتك</p> <p>٣. ماهي الأشياء التي افتقدتها أثناء تلقيك الرعاية الطبية لتأخر الحمل؟</p> <p>٤. ماهي الأشياء التي تعتقد أنها ستكون فعالة في زيادة الاستفادة من رعاية تأخر الحمل؟ أرجو الشرح</p> <p>٥. كيف تنصحين للرعاية الطبية لتأخر الحمل في المستقبل؟</p> <p>٦. إذا تم توفير كل ما أوصيت به أعلاه، هل ستلجئ لوسائل أخرى غير طبية لعلاج تأخر الحمل؟ أرجو التبرير</p> <p>٧. ماهي مكونات الرعاية المتمركزة حول المريض من وجهة نظرك؟ أرجو التفصيل</p> <p><u>ملاحظة:</u></p> <p>- ستستخدم التحقيقات حسب الحاجة</p> | <p>الأسئلة</p>                 |
| <p>✓ هل هناك أي شيء تودين إضافته؟</p> <p>✓ سأقوم بتحليل المعلومات التي أعطيتني أنت و غيرك من المشاركين. سأكون سعيدا لأرسل لك نسخة من النتيجة، إذا كانت تهتمك.</p> <p>✓ شكرا لك على وقتك</p>                                                                                                                                                                                                                                                                                                                                                                                                                                                                                        | <p>مكونات الخاتمة الرئيسية</p> |

## COREQ (CONsolidated criteria for REporting Qualitative research) Checklist

A checklist of items that should be included in reports of qualitative research. You must report the page number in your manuscript where you consider each of the items listed in this checklist. If you have not included this information, either revise your manuscript accordingly before submitting or note N/A.

| Topic                                          | Item No. | Guide Questions/Description                                                                                                                              | Reported on Page No. |
|------------------------------------------------|----------|----------------------------------------------------------------------------------------------------------------------------------------------------------|----------------------|
| <b>Domain 1: Research team and reflexivity</b> |          |                                                                                                                                                          |                      |
| <i>Personal characteristics</i>                |          |                                                                                                                                                          |                      |
| Interviewer/facilitator                        | 1        | Which author/s conducted the interview or focus group?                                                                                                   |                      |
| Credentials                                    | 2        | What were the researcher's credentials? E.g. PhD, MD                                                                                                     |                      |
| Occupation                                     | 3        | What was their occupation at the time of the study?                                                                                                      |                      |
| Gender                                         | 4        | Was the researcher male or female?                                                                                                                       |                      |
| Experience and training                        | 5        | What experience or training did the researcher have?                                                                                                     |                      |
| <i>Relationship with participants</i>          |          |                                                                                                                                                          |                      |
| Relationship established                       | 6        | Was a relationship established prior to study commencement?                                                                                              |                      |
| Participant knowledge of the interviewer       | 7        | What did the participants know about the researcher? e.g. personal goals, reasons for doing the research                                                 |                      |
| Interviewer characteristics                    | 8        | What characteristics were reported about the interviewer/facilitator? e.g. Bias, assumptions, reasons and interests in the research topic                |                      |
| <b>Domain 2: Study design</b>                  |          |                                                                                                                                                          |                      |
| <i>Theoretical framework</i>                   |          |                                                                                                                                                          |                      |
| Methodological orientation and Theory          | 9        | What methodological orientation was stated to underpin the study? e.g. grounded theory, discourse analysis, ethnography, phenomenology, content analysis |                      |
| <i>Participant selection</i>                   |          |                                                                                                                                                          |                      |
| Sampling                                       | 10       | How were participants selected? e.g. purposive, convenience, consecutive, snowball                                                                       |                      |
| Method of approach                             | 11       | How were participants approached? e.g. face-to-face, telephone, mail, email                                                                              |                      |
| Sample size                                    | 12       | How many participants were in the study?                                                                                                                 |                      |
| Non-participation                              | 13       | How many people refused to participate or dropped out? Reasons?                                                                                          |                      |
| <i>Setting</i>                                 |          |                                                                                                                                                          |                      |
| Setting of data collection                     | 14       | Where was the data collected? e.g. home, clinic, workplace                                                                                               |                      |
| Presence of non-participants                   | 15       | Was anyone else present besides the participants and researchers?                                                                                        |                      |
| Description of sample                          | 16       | What are the important characteristics of the sample? e.g. demographic data, date                                                                        |                      |
| <i>Data collection</i>                         |          |                                                                                                                                                          |                      |
| Interview guide                                | 17       | Were questions, prompts, guides provided by the authors? Was it pilot tested?                                                                            |                      |
| Repeat interviews                              | 18       | Were repeat interviews carried out? If yes, how many?                                                                                                    |                      |
| Audio/visual recording                         | 19       | Did the research use audio or visual recording to collect the data?                                                                                      |                      |
| Field notes                                    | 20       | Were field notes made during and/or after the interview or focus group?                                                                                  |                      |
| Duration                                       | 21       | What was the duration of the interviews or focus group?                                                                                                  |                      |
| Data saturation                                | 22       | Was data saturation discussed?                                                                                                                           |                      |
| Transcripts returned                           | 23       | Were transcripts returned to participants for comment and/or                                                                                             |                      |

| Topic                                  | Item No. | Guide Questions/Description                                                                                                        | Reported on Page No. |
|----------------------------------------|----------|------------------------------------------------------------------------------------------------------------------------------------|----------------------|
|                                        |          | correction?                                                                                                                        |                      |
| <b>Domain 3: analysis and findings</b> |          |                                                                                                                                    |                      |
| <i>Data analysis</i>                   |          |                                                                                                                                    |                      |
| Number of data coders                  | 24       | How many data coders coded the data?                                                                                               |                      |
| Description of the coding tree         | 25       | Did authors provide a description of the coding tree?                                                                              |                      |
| Derivation of themes                   | 26       | Were themes identified in advance or derived from the data?                                                                        |                      |
| Software                               | 27       | What software, if applicable, was used to manage the data?                                                                         |                      |
| Participant checking                   | 28       | Did participants provide feedback on the findings?                                                                                 |                      |
| <i>Reporting</i>                       |          |                                                                                                                                    |                      |
| Quotations presented                   | 29       | Were participant quotations presented to illustrate the themes/findings?<br>Was each quotation identified? e.g. participant number |                      |
| Data and findings consistent           | 30       | Was there consistency between the data presented and the findings?                                                                 |                      |
| Clarity of major themes                | 31       | Were major themes clearly presented in the findings?                                                                               |                      |
| Clarity of minor themes                | 32       | Is there a description of diverse cases or discussion of minor themes?                                                             |                      |

Developed from: Tong A, Sainsbury P, Craig J. Consolidated criteria for reporting qualitative research (COREQ): a 32-item checklist for interviews and focus groups. *International Journal for Quality in Health Care*. 2007. Volume 19, Number 6: pp. 349 – 357

**Once you have completed this checklist, please save a copy and upload it as part of your submission. DO NOT include this checklist as part of the main manuscript document. It must be uploaded as a separate file.**

Manuscript Title Patient-centred infertility care among Arab women experiencing infertility: a qualitative study

Journal: BMJ Open

Authors:

Hana Hasan Webair<sup>1,2\*</sup>,

Tengku Alina Tengku Ismail<sup>3</sup>,

Shaiful Bahari Ismail<sup>1</sup>,

Azza Jameel Khaffaji<sup>4</sup>

<sup>1</sup>Department of Family Medicine, School of Medical Sciences, Universiti Sains Malaysia, Health Campus, 16150 Kubang Kerian, Kelantan, Malaysia

<sup>2</sup>Department of Family Medicine, Hadhramout University, College of Medicine, PO Box 50512, Mukalla, Hadhramaut, Yemen

<sup>3</sup>Department of Community Medicine, School of Medical Sciences, Universiti Sains Malaysia, Health Campus, 16150 Kubang Kerian, Kelantan, Malaysia

<sup>4</sup>Obstetrics and Gynaecology Department, King Abdulaziz Hospital, Ministry of Health, P.O.Box 31467 Jeddah 21497, Saudi Arabia

\*Corresponding address: MSc, Department of Family Medicine, School of Medical Sciences, Universiti Sains Malaysia, Health Campus, 16150 Kubang Kerian, Kelantan, Malaysia. Email: hhwebair@gmail.com. Tel: +601126502099.



1  
2  
3 **Title** Patient-centred infertility care among Arab women experiencing infertility: a qualitative study  
4

5 **Journal name:** BMJ Open  
6

7 **Authors**  
8

9 Hana Hasan Webair<sup>1,2\*</sup>,

10  
11 Tengku Alina Tengku Ismail<sup>3</sup>,

12  
13 Shaiful Bahari Ismail<sup>1</sup>,

14  
15 Azza Jameel Khaffaji<sup>4</sup>  
16

17 <sup>1</sup>Department of Family Medicine, School of Medical Sciences, Universiti Sains Malaysia, Health  
18 Campus, 16150 Kubang Kerian, Kelantan, Malaysia  
19

20 <sup>2</sup>Department of Family Medicine, Hadhramout University, College of Medicine, PO Box 50512,  
21 Mukalla, Hadhramaut, Yemen  
22

23 <sup>3</sup>Department of Community Medicine, School of Medical Sciences, Universiti Sains Malaysia, Health  
24 Campus, 16150 Kubang Kerian, Kelantan, Malaysia  
25

26 <sup>4</sup>Obstetrics and Gynaecology Department, King Abdulaziz Hospital, Ministry of Health, P.O.Box  
27 31467 Jeddah 21497, Saudi Arabia  
28

29 \*Corresponding address: MSc, Department of Family Medicine, School of Medical Sciences,  
30 Universiti Sains Malaysia, Health Campus, 16150 Kubang Kerian, Kelantan, Malaysia. Email;  
31 hhwebair@gmail.com. Tel: +601126502099.  
32  
33  
34  
35  
36  
37  
38  
39  
40  
41  
42  
43  
44  
45  
46  
47  
48  
49  
50  
51  
52  
53  
54  
55  
56  
57  
58  
59  
60

**Panel: Quotations showing participants' definitions of patient-centred infertility care (PCIC) and dominant events in each patient's experience**

|                                                                                                                                                                                                                                                                                                                                                                                                                                                                                                                                                                                                                                                                                                                                                                                                                                                        |                                                                                                                                                                                                                                                                                                                                                                                                                                                                                                                                                                                                                                                                                                                                                                                                                                                                                                                                                          |
|--------------------------------------------------------------------------------------------------------------------------------------------------------------------------------------------------------------------------------------------------------------------------------------------------------------------------------------------------------------------------------------------------------------------------------------------------------------------------------------------------------------------------------------------------------------------------------------------------------------------------------------------------------------------------------------------------------------------------------------------------------------------------------------------------------------------------------------------------------|----------------------------------------------------------------------------------------------------------------------------------------------------------------------------------------------------------------------------------------------------------------------------------------------------------------------------------------------------------------------------------------------------------------------------------------------------------------------------------------------------------------------------------------------------------------------------------------------------------------------------------------------------------------------------------------------------------------------------------------------------------------------------------------------------------------------------------------------------------------------------------------------------------------------------------------------------------|
| <p><i>'we lacked health awareness. I may enter to do dental x-ray; they do not tell me you should cover your body with a special cover. So, if you don't know, you will not find guidance. Information and awareness raising are first. Awareness raising and stop putting everything on the woman'.</i></p> <p><b>Participant 1: 30- 35 years age group, primary infertility, male factor</b></p> <p>Doctors treated her as the cause for infertility and did not investigate her husband. As a result, she was exposed to unnecessary treatment for nine months, with no benefit. Finally, they performed a semen analysis and diagnosed male-factor infertility. The option of IVF was not discussed with her, and the doctor instead prescribed medication. She searched for a second opinion and knew the best option for their case was IVF.</p> | <p><i>'Regarding infertility treatment, case study...means to study all aspects...Regarding diet, psychological comfort, the patient who does something which causes the problem...I mean, I should revise the patient's case, the routines in her life. There are fixed essentials in a patient's life that could be wrong and could be the cause behind her problem'.</i></p> <p><b>Participant 2: 35-39 years age group, secondary infertility, 3 daughters, endometriosis.</b></p> <p>She had three daughters from her first marriage spontaneously. After her second marriage, she developed endometriosis, with recurrent cysts and adhesions, which caused pain and infertility. She was very upset by this new issue in her life, and how the modern medicine did not find the cause behind it. She lived in a city away from Jeddah, with an unsupportive husband who gave up on operations and follow-up. She had very poor mental health.</p> |
| <p><i>'I feel it should be the same as when I delivered for the second time. The doctor welcomed me warmly! She asked me what type of delivery I'd prefer to have—this should be your choice. I told her I wanted to deliver normally. She told me, I will give you a paper to sign, and I will do my best to deliver you normally. If there is even one percent risk for you or the baby, excuse me, I will shift you to caesarean. I mean, she explained everything for you! When she came to do anything, she explained it for me—I will do so and so for this purpose. Although I did not understand their language—it was in America—everything was by sign language. I mean, there was a big</i></p>                                                                                                                                             | <p><i>'It is clear from the words that it means when the doctor becomes interested in his patient, what the patient likes and prefers. As I mentioned, to treat the patient as a human, the way he is comfortable, without forcing him. To give him his due. For example, if there are two medicines with the same effect, I should prescribe what the patient is comfortable using. To deal with the patient in a humanitarian, not materialistic way. For example, when I gave birth to my daughter, I wanted to give the doctor who delivered her a gift, because she supported and helped me. People says it is her duty! But the doctor who knows his job makes people feel comfortable'.</i></p>                                                                                                                                                                                                                                                   |

|                                                                                                                                                                                                                                                                                                                                                                                                                                                                                                                                                                                                                                                                                                                                                                      |                                                                                                                                                                                                                                                                                                                                                                                                                                                                                                                                                                                                                                                                                                                                                                                                 |
|----------------------------------------------------------------------------------------------------------------------------------------------------------------------------------------------------------------------------------------------------------------------------------------------------------------------------------------------------------------------------------------------------------------------------------------------------------------------------------------------------------------------------------------------------------------------------------------------------------------------------------------------------------------------------------------------------------------------------------------------------------------------|-------------------------------------------------------------------------------------------------------------------------------------------------------------------------------------------------------------------------------------------------------------------------------------------------------------------------------------------------------------------------------------------------------------------------------------------------------------------------------------------------------------------------------------------------------------------------------------------------------------------------------------------------------------------------------------------------------------------------------------------------------------------------------------------------|
| <p><i>difference in her attitude, from my first delivery. This is patient-centred care’.</i></p> <p><b>Participant 3: 25- 39 years age group, secondary infertility, 2 sons, ovulatory cause</b></p> <p>Complained of inadequate information, especially regarding medication, and the absence of collaboration in management planning. She needed to ask her physician about medication, but could not reach her, due to having no method for communication. She looked for a second opinion (her friend was a doctor), who gave her a plan that was different from her doctor’s plan. She was confused and unsatisfied.</p>                                                                                                                                        | <p><b>Participant 4: 35- 39 years age group, secondary infertility, son &amp; daughter, hyperprolactinemia</b></p> <p>She did not like medication or hospital work-ups, and preferred natural remedies. She started complementary medicine, and when it failed, she sought medical care. She had irregular visits, then she stopped seeking care due to lack of appropriate appointments, very expensive treatment, and lack of support from her husband. Her husband blamed her for the infertility, although both of them had children from their first marriages, and refused semen analysis, so her doctor refused to treat her. One doctor told her she was the cause of the infertility, and another one told her after all that, you want to get pregnant (2 kids and 34 years old)!</p> |
| <p><i>‘If we make treatments personalised, if we talk about the patients themselves... my doctor was treating me, and told me, “you are overweight, so you should drink a lot of water”, talking about me personally’.</i></p> <p><b>Participant 5: 25- 29 years age group, primary infertility, ovulatory cause</b></p> <p>She thought obesity was the cause of her infertility. She tried treating this in a public hospital, but discontinued because they dealt with her disease-wise, not as a person. She started obesity treatment on her own, for herself and her husband. She went to a doctor in a public hospital, despite the very poor environment and services, and the presence of trainees, only because that doctor personalised her treatment.</p> | <p><i>‘The doctors and the nurses themselves should be good. Also, the place, the hospital itself, prepares you. The cleanliness of the hospital...The devices should be advanced enough, some hospitals are really....that’s all’.</i></p> <p><b>Participant 6: 20-24 years age group, primary infertility, unexplained infertility</b></p> <p>She had a bad experience with materialistic doctors and no health benefits. She also had bad experiences with public hospitals that lacked facilities and were a poor environment. She shifted to a private hospital, although it was expensive. The cause of her infertility remained unknown until finally, she visited a doctor who recommended a scope for the first time. She was sad nobody told her about it before!</p>                 |

|                                                                                                                                                                                                                                                                                                                                                                                                                                                                                                                                                                                                                                                                                                                                                                                                                                                                                                                                                                                                                                                     |                                                                                                                                                                                                                                                                                                                                                                                                                                                                                                                                                                                                                                                                                                                                                                                                                                                                                                                                                                                                                                                                                                                                                                                            |
|-----------------------------------------------------------------------------------------------------------------------------------------------------------------------------------------------------------------------------------------------------------------------------------------------------------------------------------------------------------------------------------------------------------------------------------------------------------------------------------------------------------------------------------------------------------------------------------------------------------------------------------------------------------------------------------------------------------------------------------------------------------------------------------------------------------------------------------------------------------------------------------------------------------------------------------------------------------------------------------------------------------------------------------------------------|--------------------------------------------------------------------------------------------------------------------------------------------------------------------------------------------------------------------------------------------------------------------------------------------------------------------------------------------------------------------------------------------------------------------------------------------------------------------------------------------------------------------------------------------------------------------------------------------------------------------------------------------------------------------------------------------------------------------------------------------------------------------------------------------------------------------------------------------------------------------------------------------------------------------------------------------------------------------------------------------------------------------------------------------------------------------------------------------------------------------------------------------------------------------------------------------|
| <p>1<br/>2<br/>3<br/>4<br/>5<br/>6<br/>7<br/>8<br/>9<br/>10<br/>11<br/>12<br/>13<br/>14<br/>15<br/>16<br/>17<br/>18<br/>19<br/>20<br/>21<br/>22<br/>23<br/>24<br/>25<br/>26<br/>27<br/>28<br/>29<br/>30<br/>31</p> <p><i>'The first thing is to take care of patients and treat them. Treatment, for example. I mean, to care about treatment and medications, what is the patient's problem—from what? Yes, they should know what the patient's problem is and treat it'.</i></p> <p><b>Participant 7: 40-45 years age group, secondary infertility, no living children, male factor</b></p> <p>The cause was unknown, apart from her age. Then, her husband developed male factor infertility after one failed IVF. She followed up in both public and private hospitals. She used traditional medicine when doctors did not diagnose the cause of her infertility.</p>                                                                                                                                                                           | <p>1<br/>2<br/>3<br/>4<br/>5<br/>6<br/>7<br/>8<br/>9<br/>10<br/>11<br/>12<br/>13<br/>14<br/>15<br/>16<br/>17<br/>18<br/>19<br/>20<br/>21<br/>22<br/>23<br/>24<br/>25<br/>26<br/>27<br/>28<br/>29<br/>30<br/>31</p> <p><i>'To study the case well from the start. To study the case seriously! Not only try, try haphazardly, and that's it. No! To study the case seriously! To consider the financial circumstances. To give it high priority, not only, "this what we have, do it"'</i>.</p> <p><b>Participant 8: 40-45 years age group, secondary infertility, 2 living children, unexplained infertility</b></p> <p>She had recurrent miscarriages after two births. Now, she is over 40. She received conflicting opinions from different doctors. Finally, after six miscarriages and getting older, she knew the best option in her case was to test the abortus for genetic disorders. However, because it was not done, she could try IVF with genetic testing for the embryos. She knew it would cost around 30,000 SR, which is out of her ability. So, she does not trust doctors and would habitually seek four different doctors' opinion before starting any treatment.</p> |
| <p>32<br/>33<br/>34<br/>35<br/>36<br/>37<br/>38<br/>39<br/>40<br/>41<br/>42<br/>43<br/>44<br/>45<br/>46<br/>47<br/>48<br/>49<br/>50<br/>51<br/>52<br/>53<br/>54<br/>55<br/>56<br/>57<br/>58<br/>59<br/>60</p> <p><i>'Do you mean all of this could be centred on me? So, the patient should have interests, have awareness, have... right? Aha! to.. of course, you cannot control that, why? Because there will be overload, so doctors will not be able to cover it all. So, whatever I tell you, it will not be covered fully; therefore, whatever you do for me I will not see anything! Aha! It depends on the patient and complaint, you know? Apart from that, the most important thing is psychological preparation'.</i></p> <p><b>Participant 9: 35-39 years age group, secondary infertility, 2 daughters, undiagnosed infertility (husband refused semen analysis)</b></p> <p>Her husband is very unsupportive and destructive. She has had poor experiences with the female doctors and good experiences with male ones, regarding</p> | <p>32<br/>33<br/>34<br/>35<br/>36<br/>37<br/>38<br/>39<br/>40<br/>41<br/>42<br/>43<br/>44<br/>45<br/>46<br/>47<br/>48<br/>49<br/>50<br/>51<br/>52<br/>53<br/>54<br/>55<br/>56<br/>57<br/>58<br/>59<br/>60</p> <p><i>'The term means to make appointments booking easily available and to listen to me. Yes! And to listen to me, I mean to hear me well, and my interests, and so on. I mean the same thing—the discrimination. To avoid discrimination when dealing with patients'.</i></p> <p><b>Participant 10: 30-35 years age group, secondary infertility, daughter &amp; son, ovulatory cause</b></p> <p>She had secondary infertility after her first daughter, and was on ovulation induction for a long time. First, she went to doctors for that purpose. Then, because it is difficult to find appointment soon, and this caused missing the chance for following ovulation and intercourse timing, thereby delaying treatment, she started taking medication illegally and following ovulation in any polyclinic nearby. She had a lot of questions and was in a hurry to get pregnant, as she had marital instability and her social norms meant</p>                         |

|                                                                                                                                                                                                                                                                                                                                                                                                                                                                                                                                                                                                                                                                                                                                                                                 |                                                                                                                                                                                                                                                                                                                                                                                                                                                                                                                                                                                                                                                                                                                                                                                                                                                                               |
|---------------------------------------------------------------------------------------------------------------------------------------------------------------------------------------------------------------------------------------------------------------------------------------------------------------------------------------------------------------------------------------------------------------------------------------------------------------------------------------------------------------------------------------------------------------------------------------------------------------------------------------------------------------------------------------------------------------------------------------------------------------------------------|-------------------------------------------------------------------------------------------------------------------------------------------------------------------------------------------------------------------------------------------------------------------------------------------------------------------------------------------------------------------------------------------------------------------------------------------------------------------------------------------------------------------------------------------------------------------------------------------------------------------------------------------------------------------------------------------------------------------------------------------------------------------------------------------------------------------------------------------------------------------------------|
| <p>communication skills. She felt men are easier to understand.</p>                                                                                                                                                                                                                                                                                                                                                                                                                                                                                                                                                                                                                                                                                                             | <p>she should have many children. Doctors gave up answering her questions. She had ovarian cysts and two operations.</p>                                                                                                                                                                                                                                                                                                                                                                                                                                                                                                                                                                                                                                                                                                                                                      |
| <p><i>'The most important thing is the behaviour of the doctor, also the receptionist, and the hospital as a whole. The nurses and all should serve the patient. I mean, some of them, their behaviour is as if you are coming to panhandle. As if they are not employed and receiving salaries! They should serve us and others. This is their job'.</i></p> <p><b>Participant 11: 30-35 years age group, primary infertility, tubal factor?</b></p> <p>She lived far away, but chose to come to Jeddah, because her friend had a positive experience. She started in government hospitals, then after long wait times and offensive behaviour from one doctor, she shifted to a private hospital, although it was very expensive.</p>                                         | <p><i>'First should be to pay attention to the patient's psychological status. To pay attention to the patient's feelings. I mean, do not destroy patients. For example, if there is no effective treatment! Or if the sperm is of no value! This sometimes destroys the patient'.</i></p> <p><b>Participant 12: 25-29 years age group, primary infertility, male factor</b></p> <p>She had failed intrauterine insemination and IVF attempts. She discovered afterwards that her doctor did not disclose to them the male factor or low success rate. She planned to change to another doctor, but could not pay the cost. She contacted an unlicensed therapist through Instagram who claimed he had medicines for sperms count and quality. She was so happy with his way of communication and that he listened to her whole history that wanted to continue with him.</p> |
| <p><i>'I hope there is something like this. It is awesome! To not be purely materialistic. Actually, the cost should not be huge. The situation should not be purely materialistic. I mean, I have to pay for anything to be done for me! For example, for the psychologist, I need to pay a large sum of money! For each visit he sets with me, I will pay?! No'.</i></p> <p><b>Participant 13: 40-45 years age group, primary infertility, tubal factor</b></p> <p>She started medical treatment, but it failed. It was found that her fallopian tubes were blocked. IVF was recommended, with some procedures beforehand. She could not do it, due to cost. She complained of social pressure and blame. She did not understand doctors well because they spoke English.</p> | <p><i>'The care, by all means, is patient-centred. There is a discussion between the doctor and patient. The doctor provides what he has, if the patient does not like something, the patient should say so. Yes. So, it depends on the patient. If the patient discusses matters with the doctor, they will find an answer. But if the doctor spontaneously asks the patient what do you want? No! Here, I will be in doubt—is this really a doctor?'</i></p> <p><b>Participant 14: 25-29 years age group, 1ry infertility, ovulatory cause</b></p> <p>She had an ovarian cyst with pain and dyspareunia. She started with a doctor who treated her with medications that showed no benefits. She then changed to another doctor, who removed the cyst surgically. She went to a third doctor for infertility, who gave her a clear plan from the start (still ongoing).</p> |
