# Supplementary material for: Patient-centred infertility care among Arab women experiencing infertility: a qualitative study
Source: PubMed Central journal article supplement — BMJ Open. 2021 Jun 18;11(6):e044300. doi: 10.1136/bmjopen-2020-044300 (PMC8215246; doi:10.1136/bmjopen-2020-044300), 2021-06-18
Supplement: bmjopen-2020-044300supp001.pdf [file bmjopen-2020-044300supp001.pdf]

# 1 Patient-centred infertility care among Arab women experiencing infertility: a qualitative study

**Title** Exploring patient-centered infertility care among Arab infertile women: a qualitative study

**Journal name:** BMJ Open

## Authors

Hana Hasan Webair<sup>1,2\*</sup>,

Tengku Alina Tengku Ismail<sup>3</sup>,

Shaiful Bahari Ismail<sup>1</sup>,

Azza Jameel Khaffaji<sup>4</sup>

<sup>1</sup>Department of Family Medicine, School of Medical Sciences, Universiti Sains Malaysia, Health Campus, 16150 Kubang Kerian, Kelantan, Malaysia

<sup>2</sup>Department of Family Medicine, Hadhramout University, College of Medicine, PO Box 50512, Mukalla, Hadhramaut, Yemen

<sup>3</sup>Department of Community Medicine, School of Medical Sciences, Universiti Sains Malaysia, Health Campus, 16150 Kubang Kerian, Kelantan, Malaysia

<sup>4</sup>Obstetrics and Gynaecology Department, King Abdulaziz Hospital, Ministry of Health, P.O.Box 31467 Jeddah 21497, Saudi Arabia

\*Corresponding address: MSc, Department of Family Medicine, School of Medical Sciences, Universiti Sains Malaysia, Health Campus, 16150 Kubang Kerian, Kelantan, Malaysia. Email: hhwebair@gmail.com. Tel: +601126502099.

2

**In-depth Interview Guide****Background Information**

|                                                                                                                                                                                                                                           |                                                                    |
|-------------------------------------------------------------------------------------------------------------------------------------------------------------------------------------------------------------------------------------------|--------------------------------------------------------------------|
| ID:                                                                                                                                                                                                                                       |                                                                    |
| Personal data                                                                                                                                                                                                                             |                                                                    |
| Age (years):                                                                                                                                                                                                                              | Sex: <input type="checkbox"/> Male <input type="checkbox"/> Female |
| Education: <input type="checkbox"/> Illiterate <input type="checkbox"/> Primary <input type="checkbox"/> Secondary<br><input type="checkbox"/> Diploma <input type="checkbox"/> Bachelor <input type="checkbox"/> Master or higher        |                                                                    |
| Occupation                                                                                                                                                                                                                                | Address                                                            |
| Infertility-related data                                                                                                                                                                                                                  |                                                                    |
| Duration of marriage (months):                                                                                                                                                                                                            | Duration of infertility (months):                                  |
| Duration of seeking fertility care (months):                                                                                                                                                                                              | No of pregnancies:                                                 |
| No. of live children:                                                                                                                                                                                                                     | Cause of infertility:                                              |
| Are you (your wife) pregnant now? <input type="checkbox"/> Yes <input type="checkbox"/> No                                                                                                                                                |                                                                    |
| Where you had received fertility care; please write the name of clinic and hospital. If you sought more than one clinic, please mention them chronologically and specify the period in front of each.<br>.....<br>.....<br>.....<br>..... |                                                                    |

**In-depth Interview Guide (con'd)**

|                             |                                                                                                                                                                                                                                                                                                                                                                                                                                                                                                                                                                                                                                                                                                                                                                                                                                                                    |
|-----------------------------|--------------------------------------------------------------------------------------------------------------------------------------------------------------------------------------------------------------------------------------------------------------------------------------------------------------------------------------------------------------------------------------------------------------------------------------------------------------------------------------------------------------------------------------------------------------------------------------------------------------------------------------------------------------------------------------------------------------------------------------------------------------------------------------------------------------------------------------------------------------------|
| Introduction Key Components | <ul style="list-style-type: none"> <li>✓ Participant name and personal data</li> <li>✓ Research information</li> <li>✓ Signature of consent</li> </ul>                                                                                                                                                                                                                                                                                                                                                                                                                                                                                                                                                                                                                                                                                                             |
| Questions                   | <ol style="list-style-type: none"> <li>1. What types of infertility medical care have you received?</li> <li>2. What characteristics of infertility care, would you recommend be sustained and/or introduced? Please provide a justification for your response.</li> <li>3. What are the things you have missed in your infertility care?</li> <li>4. What do you think will work well in increasing utilization of infertility care? Please explain</li> <li>5. How would you recommend for future infertility care?</li> <li>6. If all what you have recommended above are made available, would you seek other non-medical source of care for infertility? Please justify</li> <li>7. What are the elements of patient-centered fertility care from your point of view? Please elaborate</li> </ol> <p><u>N.B.</u></p> <p>-Probes should be used as needed.</p> |
| Closing Key Components      | <ul style="list-style-type: none"> <li>✓ Is there anything more you would like to add?</li> <li>✓ I'll be analyzing the information you and others gave me. I'll be happy to send you a copy of the result, if you are interested.</li> <li>✓ Thank you for your time.</li> </ul>                                                                                                                                                                                                                                                                                                                                                                                                                                                                                                                                                                                  |

## دليل المقابلة المتعمقة

|                                                                                                                                                                                                                                                                                                                                                                                                                                                                                                                                                                                                                                                                                    |                                |
|------------------------------------------------------------------------------------------------------------------------------------------------------------------------------------------------------------------------------------------------------------------------------------------------------------------------------------------------------------------------------------------------------------------------------------------------------------------------------------------------------------------------------------------------------------------------------------------------------------------------------------------------------------------------------------|--------------------------------|
| <p>✓ البيانات الشخصية</p> <p>✓ معلومات حول البحث</p> <p>✓ التوقيع على الموافقة</p>                                                                                                                                                                                                                                                                                                                                                                                                                                                                                                                                                                                                 | <p>مكونات المقدمة الرئيسية</p> |
| <p>١. ماهي أنواع الرعاية الطبية لتأخر الحمل التي خضعت لها من قبل؟</p> <p>٢. ماهي مواصفات الرعاية الصحية لتأخر الحمل التي توصين أن نبقى عليها أو نستحدثها؟ أرجو تبرير جابتك</p> <p>٣. ماهي الأشياء التي افتقدتها أثناء تلقيك الرعاية الطبية لتأخر الحمل؟</p> <p>٤. ماهي الأشياء التي تعتقد أنها ستكون فعالة في زيادة الاستفادة من رعاية تأخر الحمل؟ أرجو الشرح</p> <p>٥. كيف تتصحين للرعاية الطبية لتأخر الحمل في المستقبل؟</p> <p>٦. إذا تم توفير كل ما أوصيت به أعلاه، هل ستلجئ لوسائل أخرى غير طبية لعلاج تأخر الحمل؟ أرجو التبرير</p> <p>٧. ماهي مكونات الرعاية المتمركزة حول المريض من وجهة نظرك؟ أرجو التفصيل</p> <p><u>ملاحظة:</u></p> <p>- ستستخدم التحقيقات حسب الحاجة</p> | <p>الأسئلة</p>                 |
| <p>✓ هل هناك أي شيء تودين إضافته؟</p> <p>✓ سأقوم بتحليل المعلومات التي أعطيتني أنت و غيرك من المشاركين. سأكون سعيدا لأرسل لك نسخة من النتيجة، إذا كانت تهمك.</p> <p>✓ شكرا لك على وقتك</p>                                                                                                                                                                                                                                                                                                                                                                                                                                                                                         | <p>مكونات الخاتمة الرئيسية</p> |
